# Supplementary material
Source: PubMed Central journal article supplement (PMC4248843)
Supplement: JB.02243-14_zjb999093411so1.pdf [file JB.02243-14_zjb999093411so1.pdf]

**Supplemental Material for:**  
**Characterization of a novel plasmid-borne thiopeptide gene cluster**  
**in *Staphylococcus epidermidis* strain 115**

Philip R. Bennallack<sup>1</sup>, Scott R. Burt<sup>2</sup>, Michael J. Heder<sup>1</sup>, Richard A. Robison<sup>1\*</sup>,  
and Joel S. Griffitts<sup>1\*</sup>

<sup>1</sup>Department of Microbiology and Molecular Biology, Brigham Young University, Provo, UT 84602, USA

<sup>2</sup>Department of Chemistry and Biochemistry, Brigham Young University, Provo, UT 84602, USA

**Contents:**

1. Supplemental Methods (Pages 2-3)
2. List of Supplemental Tables and Figures (Page 4)
3. Supplemental Tables S1-S5 (Pages 5-11)
4. Supplemental Figures S1-S2 (Pages 12-23)
5. Supplemental References (Page 24)

## SUPPLEMENTAL METHODS

### I. Transformation of *Bacillus subtilis* 168 by starvation-induced competence

- modified from (1)

#### a) Media preparation

Starvation medium 1 (SM1) contains 0.2% ammonium sulfate, 1.2% dipotassium hydrogen phosphate, 0.6% potassium dihydrogen phosphate, 0.1% sodium citrate dihydrate, 0.2% magnesium sulfate heptahydrate, 0.2% yeast extract, 0.025% casamino acids, 0.01% L-tryptophan and 0.5% glucose.

Starvation medium 2 (SM2) differs slightly from SM1, containing 0.2% ammonium sulfate, 1.2% dipotassium hydrogen phosphate, 0.6% potassium dihydrogen phosphate, 0.1% sodium citrate dihydrate, 0.8% magnesium sulfate heptahydrate, 0.1% yeast extract, 0.0125% casamino acids, 0.01% L-tryptophan, 0.5% glucose and 0.022% calcium chloride dihydrate.

Both solutions were mixed fresh on the day of transformation from stock solutions prepared ahead of time. The ammonium sulfate, dipotassium hydrogen phosphate, potassium dihydrogen phosphate and sodium citrate dihydrate can be combined and autoclaved to provide the base (ST Base) for both media. All other solutions were maintained as separate stocks, sterilized by autoclaving (magnesium sulfate heptahydrate and calcium chloride) or filter sterilization (yeast extract, casamino acids, tryptophan and glucose).

#### b) Preparation of competent cells

Pure cultures of *B. subtilis* 168 cells were grown on LB agar without antibiotics, then used to inoculate a 4-ml liquid culture of LB. Cells were grown overnight at 37°C, 225rpm for 14-18 h. 1 ml of overnight culture was combined with 15 ml of warm, freshly prepared SM1 (final OD<sub>600</sub> ≈ 0.4-0.6) and incubated at 37°C, 225rpm for 5 h. Following incubation in SM1, an equal volume of pre-warmed SM2 was added and cells were further incubated for 2 h under the same conditions. At this stage and for at least 60-90 min after, cells are competent and are ready for transformation. Cells may be combined with glycerol (final conc. 10%) and frozen at -80°C at this stage, however subsequent transformations may be at least two-fold less efficient than those performed with fresh competent cells.

**c) Transformation of competent cells**

500  $\mu$ l of competent *B. subtilis* cells were combined with 100-500 ng plasmid DNA (<5  $\mu$ l volume) and incubated at 37°C (with rotation) for 30 min. 200  $\mu$ l of fresh LB was then added to cells and incubated for an additional 60 min. Following this final incubation step, the desired volume of cells was plated on antibiotic-containing LB (LB-Cm<sub>5</sub>) and grown overnight at 37°C. Transformation efficiencies in the range of  $2 \times 10^4$ - $2 \times 10^5$  transformants per  $\mu$ g DNA are routinely observed using this procedure.

**I. Transformation of *Bacillus subtilis* SCK6 by xylose induced competence**

*B. subtilis* strain SCK6 (2) harbors a Pxyl-*comK* insertion for rapid induction of competence in the presence of xylose. Strains were transformed by diluting overnight cultures of strain SCK6 into LB-xyl (1% w/v) for 2 hours at 37°C to induce competence. At this stage cells were mixed with 100-500 ng plasmid DNA and incubated for 60 min prior to selection. Following this final incubation step, the desired volume of cells was plated on antibiotic-containing LB (LB-Cm<sub>5</sub>) and grown overnight at 37°C. High efficiency transformations are readily obtained in this manner.

Supplemental material for: *S. epidermidis* 115 thiopeptide plasmid

## **LIST OF SUPPLEMENTAL TABLES AND FIGURES**

Table S1. Strains and assay conditions used in inhibition studies

Table S2. Primer pairs used in assembly of pBac115.

Table S3. NMR protocols used

Table S4. Summary of pBac115 blastp results

Table S5. Chemical shifts of micrococcin P1 in DMSO-d<sub>6</sub>

Figure S1. Complete maps and sequences of plasmids used to construct *B. subtilis* mutants

Figure S2. Summary of NMR 2D correlations

## SUPPLEMENTAL TABLES S1-S5

**Table S1.** Strains and Assay Conditions Used in Inhibition Studies

| Indicator (Test) Strain                               | Gram Stain | Assay Method <sup>a</sup> | Sensitive | Culture Media <sup>b</sup> |
|-------------------------------------------------------|------------|---------------------------|-----------|----------------------------|
| <i>B. anthracis</i> Sterne strain 1043                | Positive   | Patch                     | +         | TSA                        |
| <i>B. brevis</i> ATCC 8246                            | Positive   | Spot                      | +         | NB                         |
| <i>B. cereus</i> ATCC 14579                           | Positive   | Patch, spot               | -         | LB, TSA                    |
| <i>B. licheniformis</i> ATCC 14580                    | Positive   | Spot                      | +         | NB                         |
| <i>B. megaterium</i> ATCC 15127                       | Positive   | Patch                     | +         | LB, TSA                    |
| <i>B. mycooides</i> ATCC 6462                         | Positive   | Spot                      | +         | NB                         |
| <i>B. sphaericus</i> ATCC 14577                       | Positive   | Spot                      | +         | NB                         |
| <i>B. subtilis</i> ATCC 19659                         | Positive   | Spot                      | +         | LB,TSA                     |
| <i>B. subtilis</i> ATCC 6051                          | Positive   | Spot                      | +         | LB                         |
| <i>B. subtilis</i> SCK6                               | Positive   | Spot                      | +         | LB                         |
| <i>B. subtilis</i> subsp. <i>spizizenii</i> ATCC 6633 | Positive   | Patch, spot               | -         | NB                         |
| <i>B. subtilis</i> 168                                | Positive   | Spot                      | +         | LB                         |
| <i>B. thuringiensis</i> ATCC 19269                    | Positive   | Spot                      | +         | NB                         |
| <i>B. thuringiensis</i> Al Hakam                      | Positive   | Spot                      | +         | NB                         |
| <i>C. difficile</i> ATCC 43598                        | Positive   | Spot                      | +         | LB                         |
| <i>C. perfringens</i> ATCC 13124                      | Positive   | Spot                      | +         | TSA w/ blood               |
| <i>E. faecalis</i> ATCC 19433                         | Positive   | Spot                      | +         | LB                         |
| <i>E. faecalis</i> clinical isolate RL112105 (VRE)    | Positive   | Patch                     | +         | TSA                        |
| <i>L. monocytogenes</i> ATCC 13932                    | Positive   | Spot                      | +         | LB,TSA                     |
| <i>L. monocytogenes</i> ATCC 15313                    | Positive   | Spot                      | +         | LB,TSA                     |
| <i>P. polymyxa</i> ATCC 842                           | Positive   | Spot                      | +         | NB                         |
| <i>S. agalactiae</i> ATCC 12386                       | Positive   | Spot                      | +         | TSA w/ blood               |
| <i>S. aureus</i> ATCC 29213                           | Positive   | Spot                      | +         | LB                         |
| <i>S. aureus</i> ATCC 6538                            | Positive   | Spot                      | +         | LB                         |
| <i>S. aureus</i> ATCC 43300 (MRSA)                    | Positive   | Spot                      | +         | LB                         |
| <i>S. aureus</i> environmental isolate RL1 (MRSA)     | Positive   | Spot                      | +         | LB                         |
| <i>S. aureus</i> environmental isolate RL2 (MRSA)     | Positive   | Spot                      | +         | LB                         |
| <i>S. aureus</i> environmental isolate RL3 (MRSA)     | Positive   | Spot                      | +         | LB                         |
| <i>S. aureus</i> environmental isolate RL4 (MRSA)     | Positive   | Spot                      | +         | TSA                        |
| <i>S. aureus</i> environmental isolate RL5 (MRSA)     | Positive   | Spot                      | +         | LB                         |
| <i>S. epidermidis</i> PB004                           | Positive   | Patch                     | +         | LB, TSA                    |
| <i>S. epidermidis</i> PB023                           | Positive   | Spot                      | +         | LB                         |
| <i>S. pneumoniae</i> ATCC 6303                        | Positive   | Patch                     | +         | LB                         |
| <i>S. pyogenes</i> RL421682                           | Positive   | Patch                     | +         | LB                         |
| <i>S. pyogenes</i> ATCC 51339                         | Positive   | Patch                     | +         | LB                         |
| <i>B. thailandensis</i> E135                          | Negative   | Spot                      | -         | LB                         |
| <i>E. coli</i> 0157:H7                                | Negative   | Patch                     | -         | TSA                        |
| <i>Y. pseudotuberculosis</i> RLPI399                  | Negative   | Patch                     | -         | LB                         |
| <i>M. smegmatis</i> ATCC 14468                        | Acid fast  | Spot                      | +         | 7H11                       |

<sup>a</sup> Patch, flanking patch assay; Spot, spot-on-lawn assay<sup>b</sup> LB, Luria broth; NB, nutrient broth; TSA, tryptic soy agar; 7H11, mycobacteria 7H11 agar

**Table S2:** Primer pairs used in assembly of pBac115<sup>a</sup>

| Primer pair | Primer name | Direction | Sequence (5' - 3')      | Expected product (bp) | Target   |
|-------------|-------------|-----------|-------------------------|-----------------------|----------|
| 1           | oPB009      | Forward   | GGAGTATTATACGCTGCCAGC   | 2068                  | Contig 1 |
|             | oPB010      | Reverse   | CCACAAGGAAATGCATCCGCA   |                       |          |
| 2           | oPB011      | Forward   | GCTGACACAACCTTCTCCTGG   | 2493                  | Contig 1 |
|             | oPB012      | Reverse   | ATTGGACCAGGAATGGGCAG    |                       |          |
| 3           | oPB015      | Forward   | CTTGTGTGATCTCCGGCATTCC  | 2397                  | Contig 2 |
|             | oPB016      | Reverse   | TGCCTGGTGGCTCATCTTTG    |                       |          |
| 4           | oPB019      | Forward   | TGAACGTGGAGATGTTGCTGG   | 1895                  | Contig 3 |
|             | oPB020      | Reverse   | CAGAATGGAGGGACGAACAAGTG |                       |          |
| 5           | oPB023      | Forward   | TTACAAGCAAGCGTAGCGAGC   | 659                   | Contig 4 |
|             | oPB024      | Reverse   | ATCGCTTGAGCCCTACTCTCC   |                       |          |
| 6           | oPB027      | Forward   | CGAATGATGTGGTTATCGCAGG  | 776                   | Contig 5 |
|             | oPB028      | Reverse   | TCACTTCCATATCCAGCGTCG   |                       |          |

<sup>a</sup>Primer pairs 1, 2 and 4 amplified the expected product from strain 115 but not the pBac115-deficient strain 115C. All other primer pairs amplified the expected products from both strains.

**Table S3.** NMR Protocols

| <b>Protocol</b>                           | <b>Key Parameters</b>                            |
|-------------------------------------------|--------------------------------------------------|
| <sup>1</sup> H                            | 64 scans                                         |
| <sup>13</sup> C                           | 20000 scans                                      |
| gradient-filtered DQ-COSY                 | 16 scans, 400 increments                         |
| z-filtered TOCSY                          | 32 scans, 256 increments, 90 ms DIPSI-2 spinlock |
| adiabatic HSQC                            | 16 scans, 96 increments, J1=146 Hz               |
| band-selective adiabatic HSQC             | 32 scans, 128 increments, 5-80 ppm               |
| band-selective adiabatic HSQC             | 32 scans, 128 increments, 105-150 ppm            |
| adiabatic HSQC-TOXY                       | 64 scans, 96 increments, 90 ms MLEV-17 spinlock  |
| gradient-filtered adiabatic HMBC          | 16 scans, 96 increments, Jn=8 Hz                 |
| band-selective grad.-filtered adiab. HMBC | 64 scans, 128 increments, Jn=12 Hz, 110-180 ppm  |
| band-selective grad.-filtered adiab. HMBC | 256 scans, 128 increments, Jn=3 Hz, 110-180 ppm  |
| adiabatic <sup>15</sup> N-HSQC            | 128 scans, 96 increments, J1= 90 Hz              |
| adiabatic <sup>15</sup> N-HSQC-TOXY       | 128 scans, 96 increments, 80 ms MLEV-17 spinlock |

**Table S4.** Summary of pBac115 Blastp Results

| pBac115 Gene Product | Size (aa) | Thiocillin Protein Homolog <sup>a</sup> | Size (aa) | Identity/similarity /coverage % <sup>b</sup>          | Top blastp Results                                                                                                                                                                                                                                                                | Predicted function <sup>c</sup>                       |
|----------------------|-----------|-----------------------------------------|-----------|-------------------------------------------------------|-----------------------------------------------------------------------------------------------------------------------------------------------------------------------------------------------------------------------------------------------------------------------------------|-------------------------------------------------------|
| Orf16 (TcIE)         | 50        | TcIE                                    | 53        | 52/65/98 (entire product); 100/100/100 (core peptide) | none                                                                                                                                                                                                                                                                              | Structural (precursor) peptide                        |
| Orf17 (TcIS)         | 224       | TcIS                                    | 237       | 23/44/81                                              | Short-chain dehydrogenase/reductase SDR [ <i>Pseudomonas</i> sp. CFII64], oxidoreductase [ <i>Pseudomonas syringae</i> ], putative uncharacterized protein [ <i>Megamonas funiformis</i> CAG:377]                                                                                 | Stochastic changes (decarboxylation) at residue 14(3) |
| Orf18                | 160       | -                                       | -         | -                                                     | Hypothetical cyanophage protein [ <i>Synechococcus</i> phage S-RSM4], putative regulator of cell autolysis [ <i>Solitalea canadensis</i> ], serine phosphatase [uncultured bacterium]                                                                                             | Unknown                                               |
| Orf19 (TcIQ)         | 141       | TcIQ/TcIT                               | 142       | 60/79/99                                              | 50S ribosomal protein L11 [ <i>Leptolyngbya</i> sp. PCC 7376], 50S ribosomal protein L11 [ <i>Nocardioides</i> sp. JS614], 50S ribosomal protein L11 [ <i>Geitlerinema</i> sp. PCC 7105]                                                                                          | Self-immunity                                         |
| Orf20 (TcII)         | 243       | TcII                                    | 504       | 41/53/13                                              | Bacterioferritin comigratory protein [ <i>Lactobacillus gasserii</i> ], thiazole-containing bacteriocin maturation protein [ <i>Geobacillus stearothermophilus</i> NUB3621], bacteriocin maturation protein [ <i>Bacillus</i> sp. UNC41MFS5]                                      | Other modification                                    |
| Orf21 (TcIJ)         | 564       | TcIJ                                    | 661       | 35/50/87                                              | Conserved hypothetical protein [ <i>Lactobacillus gasserii</i> ], SagD family biosynthesis docking scaffold protein [ <i>Bacillus cereus</i> ], bacteriocin biosynthesis protein SagD [ <i>Alicyclobacillus pomorum</i> ], cyclodehydratase [ <i>Streptomyces</i> sp. NRRL 30471] | Heterocyclization (4), YcaO (DUF181) homolog(5)       |
| Orf22 (TcIK)         | 844       | TcIK                                    | 872       | 28/47/92                                              | Lanthionine biosynthesis protein [ <i>Bacillus cereus</i> ], lantibiotic dehydratase, superfamily protein [ <i>Lactobacillus gasserii</i> ], NosE [ <i>Streptomyces actuosus</i> ], NocE [ <i>Nocardia</i> sp. ATCC 202099]                                                       | Dehydratase (full length)(4)                          |



**Table S4. (continued)** Summary of pBac115 Blastp Results

| pBac115 Gene Product | Size (aa) | Thiocillin Protein Homolog <sup>a</sup> | Size (aa) | Identity/similarity /coverage % <sup>b</sup> | Top blastp Results                                                                                                                                                                                                                   | Predicted function <sup>c</sup>                        |
|----------------------|-----------|-----------------------------------------|-----------|----------------------------------------------|--------------------------------------------------------------------------------------------------------------------------------------------------------------------------------------------------------------------------------------|--------------------------------------------------------|
| Orf23 (TcIL)         | 268       | TcIL                                    | 324       | 28/45/95                                     | Lantibiotic biosynthesis protein [ <i>Lactobacillus gasseri</i> ], lantibiotic biosynthesis protein [ <i>Bacillus cereus</i> ], thiopeptide-type bacteriocin biosynthesis domain-containing protein [ <i>Enterococcus faecalis</i> ] | Dehydratase (truncated)(4)                             |
| Orf24 (TcIM)         | 265       | TcIM                                    | 326       | 32/52/79                                     | Hypothetical protein [ <i>Bacillus cereus</i> ], hypothetical protein [ <i>Lactobacillus gasseri</i> ], hypothetical protein [ <i>Actinoboloteichus spitiensis</i> ]                                                                 | Cycloaddition of Dha1 and Dha10 to produce pyridine(3) |
| Orf25 (TcIN)         | 448       | TcIN                                    | 523       | 25/43/95                                     | NADH oxidase [ <i>Bacillus cereus</i> ], conserved hypothetical protein [ <i>Lactobacillus gasseri</i> ], SagB-type dehydrogenase domain-containing protein [ <i>B. cereus</i> ]                                                     | Heterocyclization(4)<br>McbC homolog(5)                |
| Orf26 (TcIP)         | 233       | TcIP                                    | 257       | 38/57/99                                     | Short-chain dehydrogenase [ <i>Bacillus cereus</i> ], 3-oxoacyl-[acyl-carrier-protein] reductase FabG [ <i>Clostridium saccharobutylicum</i> ], hypothetical protein [ <i>Saccharibacillus kuerlensis</i> ]                          | Stochastic changes (decarboxylation) at residue 14(3)  |
| Orf27 (TcIU)         | 114       | TcIU                                    | 124       | 29/57/58                                     | MULTISPECIES: transcriptional activator tipA [ <i>Lactobacillus casei</i> group], transcriptional activator tipA [ <i>Lactobacillus casei</i> ], MerR family transcriptional regulator [ <i>Lactobacillus casei</i> ]                | Regulation(4)                                          |

<sup>a</sup> based upon comparisons with *B. cereus* ATCC 14579<sup>b</sup> results of directed blastp between translated products of pBac115 ORFs and *B. cereus* ATCC 14579 tcl genes<sup>c</sup> numbers in parentheses correspond to references which can be found in the Supplemental References section

**Table S5.** Chemical Shifts of Micrococcin P1 in DMSO-d6

| Position | Residue                      | Type | $\delta^{13}\text{C}$ (ppm) | $\delta^{15}\text{N}$ (ppm) | $\delta^1\text{H}$ (ppm) | Mult. | J (Hz)    |
|----------|------------------------------|------|-----------------------------|-----------------------------|--------------------------|-------|-----------|
| 1        | Thr 1, $\gamma$              | CH3  | 21.51                       | -                           | 1.00                     | d     | 6.2       |
| 2        | Thr 1, $\beta$               | CH   | 65.55                       | -                           | 3.69                     | m     | -         |
| 2        | Thr 1, OH                    | OH   | -                           | -                           | 4.63                     | d     | <i>br</i> |
| 3        | <sup>a</sup> Thr 1, $\alpha$ | CH2  | 47.35                       | -                           | 3.06                     | m     | -         |
| 4        | Thr 1, NH                    | NH   | -                           | 107.30                      | 7.90                     | t     | 5.8       |
| 5        | Thr 2, CO                    | C=O  | 164.79                      | -                           | -                        | -     | -         |
| 6        | Thr 2, $\alpha$              | C    | 131.07                      | -                           | -                        | -     | -         |
| 7        | <sup>b</sup> Thr 2, $\beta$  | CH   | 128.31                      | -                           | 6.50                     | q     | 7.0       |
| 8        | <sup>b</sup> Thr 2, $\gamma$ | CH3  | 13.99                       | -                           | 1.68                     | d     | 7.0       |
| 9        | Thr 2, NH                    | NH   | -                           | 117.20                      | 9.51                     | s     | -         |
| 10       | <sup>c</sup> Cys 1, CO       | C=O  | 159.44                      | -                           | -                        | -     | -         |
| 11       | Thiazole 1                   | C    | 150.90                      | -                           | -                        | -     | -         |
| 12       | Thiazole 1                   | CH   | 125.85                      | -                           | 8.44                     | s     | -         |
| 13       | Thiazole 1                   | C    | 161.87                      | -                           | -                        | -     | -         |
| 14       | Thiazole 2                   | C    | 149.90                      | -                           | -                        | -     | -         |
| 15       | Thiazole 2                   | CH   | 122.14                      | -                           | 8.57                     | s     | -         |
| 16       | Thiazole 2                   | C    | 168.81                      | -                           | -                        | -     | -         |
| 17       | Pyridine                     | C    | 150.21                      | -                           | -                        | -     | -         |
| 18       | Pyridine                     | CH   | 119.12                      | -                           | 8.32                     | d     | 8.1       |
| 19       | Pyridine                     | CH   | 141.14                      | -                           | 8.43                     | d     | 8.1       |
| 20       | Pyridine                     | C    | 129.60                      | -                           | -                        | -     | -         |
| 21       | Pyridine                     | C    | 151.53                      | -                           | -                        | -     | -         |
| 22       | Thiazole 3                   | C    | 152.95                      | -                           | -                        | -     | -         |
| 23       | Thiazole 3                   | CH   | 121.90                      | -                           | 8.10                     | s     | -         |
| 24       | Thiazole 3                   | C    | 170.46                      | -                           | -                        | -     | -         |
| 25       | Thr 3, $\alpha$              | CH   | 56.59                       | -                           | 5.06                     | dd    | 4.6, 8.8  |
| 26       | Thr 3, $\beta$               | CH   | 67.60                       | -                           | 3.99                     | m     | -         |
| 26       | Thr 3, OH                    | OH   | -                           | -                           | 4.76                     | d     | <i>br</i> |
| 27       | Thr 3, $\gamma$              | CH3  | 21.07                       | -                           | 1.02                     | d     | 6.4       |
| 28       | Thr 3, NH                    | NH   | -                           | 115.40                      | 8.21                     | d     | 8.9       |
| 29       | <sup>c</sup> Cys 4, CO       | C=O  | 160.91                      | -                           | -                        | -     | -         |
| 30       | Thiazole 4                   | C    | 149.56                      | -                           | -                        | -     | -         |
| 31       | Thiazole 4                   | CH   | 125.15                      | -                           | 8.28                     | s     | -         |
| 32       | Thiazole 4                   | C    | 170.32                      | -                           | -                        | -     | -         |
| 33       | Val $\alpha$                 | CH   | 55.85                       | -                           | 5.12                     | dd    | 9.0, 9.0  |
| 34       | Val $\beta$                  | CH   | 32.68                       | -                           | 2.50                     | m     | -         |

Supplemental material for: *S. epidermidis* 115 thiopeptide plasmid

|    |                              |     |        |        |      |    |          |
|----|------------------------------|-----|--------|--------|------|----|----------|
| 35 | <sup>d</sup> Val $\gamma$    | CH3 | 18.94  | -      | 0.96 | d  | 6.7      |
| 36 | <sup>d</sup> Val $\gamma$    | CH3 | 20.03  | -      | 0.85 | d  | 6.6      |
| 37 | Val NH                       | NH  | -      | 120.10 | 8.38 | d  | 9.0      |
| 38 | <sup>c,e</sup> Cys 5, CO     | C=O | 160.24 | -      | -    | -  | -        |
| 39 | Thiazole 5                   | C   | 148.71 | -      | -    | -  | -        |
| 40 | Thiazole 5                   | CH  | 124.92 | -      | 8.19 | s  | -        |
| 41 | Thiazole 5                   | C   | 166.81 | -      | -    | -  | -        |
| 42 | Thr 4, $\alpha$              | C   | 130.09 | -      | -    | -  | -        |
| 43 | <sup>b</sup> Thr 4, $\beta$  | CH  | 129.07 | -      | 6.45 | q  | 6.9      |
| 44 | <sup>b</sup> Thr 4, $\gamma$ | CH3 | 14.24  | -      | 1.74 | d  | 6.8      |
| 45 | Thr 4, NH                    | NH  | -      | 120.40 | 9.51 | s  | -        |
| 46 | Thr 5, CO                    | C=O | 168.98 | -      | -    | -  | -        |
| 47 | Thr 5, $\alpha$              | CH  | 58.09  | -      | 4.67 | dd | 3.4, 8.0 |
| 48 | Thr 5, $\beta$               | CH  | 67.98  | -      | 4.37 | m  | -        |
| 48 | Thr 5, OH                    | OH  | -      | -      | 5.42 | d  | 6.0      |
| 49 | Thr 5, $\gamma$              | CH3 | 20.31  | -      | 1.36 | d  | 6.3      |
| 50 | Thr 5, NH                    | NH  | -      | 109.30 | 7.85 | d  | 7.9      |
| 51 | <sup>c,e</sup> Cys 6, CO     | C=O | 160.27 | -      | -    | -  | -        |
| 52 | Thiazole 6                   | C   | 150.12 | -      | -    | -  | -        |
| 53 | Thiazole 6                   | CH  | 126.31 | -      | 8.36 | s  | -        |
| 54 | Thiazole 6                   | C   | 164.54 | -      | -    | -  | -        |

<sup>1</sup>H and <sup>13</sup>C chemical shifts obtained from both 1D and 2D spectra; <sup>15</sup>N chemical shifts obtained from 2D spectra. Multiplicities and J values obtained from 1D <sup>1</sup>H spectrum. <sup>a</sup>Thr residue is decarboxylated. <sup>b</sup>Thr residue is dehydrated. <sup>c</sup>Remainder of the Cys is in a thiazole ring. <sup>d</sup>The assignment of carbons 35 and 36 is ambiguous. <sup>e</sup>The assignment of carbons 38 and 51 is ambiguous. *br* denotes a signal that was too broad to accurately measure the J value.

**SUPPLEMENTAL FIGURES S1-S2**

**FIG S1.** Complete maps and sequences of plasmids used to generate *B. subtilis* mutants

**A** Plasmid pRB014 used to generate *B. subtilis* SCK6 *amyE::tclQ-orf18-cat* mutant. The plasmid map shows critical features and unique restriction sites, where relevant. The complete nucleotide sequence is provided below with *tclQ* and *cat* shown in lowercase font.

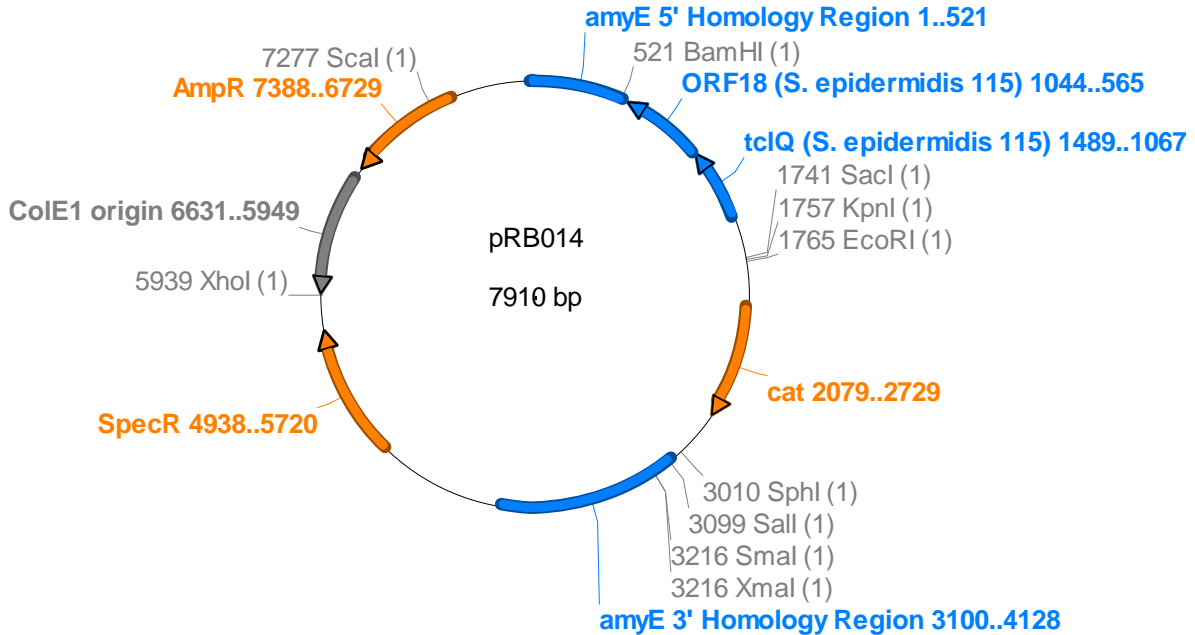

```

ATGTTTGCAAAACGATTCAAACCTCTTTACTGCCGTTATTTCGCTGGATTTTTTATTGCTGTTTCATTTGGTTCTGGCAGGACC
GGCGGCTGCGAGTGCTGAAACGGCGAACAATCGAATGAGCTTACAGCACCCTCGATCAAAGCGGAACCATTCTTCATGCAT
GGAATTGGTCGTTCAATACGTTAAAAACACAATATGAAGGATATTCATGATGCAGGATATACAGCCATTCAGACATCTCCGATT
AACCAAGTAAAGGAAGGGAATCAAGGAGATAAAAGCATGTGCAACTGGTACTGGCTGTATCAGCCGACATCGTATCAAATTGG
CAACCGTTACTTAGTACTGAACAAGAATTTAAAGAAATGTGTGCAGCCGCTGAAGAATATGGCATAAAGGTCATTGTTGACG
CGGTCATCAATCATAACCACAGTGATTATGCCGCGATTTCCAATGAGGTTAAGAGTATTCCAACTGGACACATGGAAACACA
CAAATTA AAAACTGGTCTGATCGGATCCGTAAGCAATAGGACTTGTTCCTCCATATATTATAACAATTATCCATGATTATTAT
CCTCATAAATTGGATAGTTGATTTTACCATATCTAGAGTAGGTAGTAATTAAGTAATCTTCAATAAAAATGATATCTTTAAAT
AACTCCATCTGTGGATTGGTAATATTACATTCACTTAACAAATAATACTAGTTCTGATATTTTTAAAATTTATGTATCTGTG
ATGCCTAAAGGTAGATTGTTTTAAAATTTCTTATAATATTAAGCTATTTCAAGTATAAGTTCTTCGTAACCTTCACCTTGAT
AGTTAATTA AAAATTCGTTACAATTATTGGAATTTTAAACAAAATAACTATTTAATATCTGTCGATTCTTTTCTAATAGTC
ATCACTTCTACATCAAATTTCTCGAACAAAGGGTTGCCATATATACATTCTGAGAAATCTAACGTTTCTACTTTATTCGACGA
ATCACACATACATTGATATTTAATCTCGTCAAAAATTTTTTATACATAGGATATAAAGAAAGTAGAAGActaatcttctact
ttgactcccatatcttagcagtcaccttcaatcattgacattgctgtttcaatagaacttgcatcagatcaggcatttttat
ttctgcaatctctgtaaactcttctttgaaacttcttacaatcttctgtttggaacaccagatcctttatgatatgtg
ctttctcttttattaattcagctgtgggaggagtttttagtataaagttaaagcttcgatcttcatataccgtaattctgca
ggaataaccccagacttttcttagtctgagcattatattgtgttacaactccataatattaactcctgctgtgggctaagc
agtacctaccggaggtgctgggagaagcttttccagcttcaattgaatattaataatttgctttatagcttttgccatTATTC
GTCACCTCACTTTCAATAATTTTCTATTTAAATATATCCTAAAGAACTATACACTAGTGTAACTAAAAAATCAAGAAAAGAAA
GAGGGCTAATATGATTTACTATTTAAAAAAGATACATTTTACATAAAAACACATAATGAAGGTATTTTATTCAAAAATAATT
TTACAAATTTAGAAGTAAAACTCATAAAAGTTACTATGTCTTTGAAAACCTAATTGAGTATCTCAATGGTTCCTATACAGAG
CTCAGTCTAGACTGGTACCTCGAATTCTCATGTTTGACAGCTTATCATCGGCAATAGTTACCCTTATTATCAAGATAAGAAAG
AAAAGGATTTTTCTGCTACGCTCAAATCCTTTAAAAAACACAAAAGACCACATTTTTTAATGTGGTCTTTTATTCTTCAACTA
AAGCACCATTAGTTCAACAACGAAAATTGGATAAAGTGGGATATTTTTAAATATATATTTATGTTACAGTAATATTGACT
TTTAAAAAAGGATTGATTCTAATGAAGAAAGCAGACAAGTAAGCCTCCTAAATTCACCTTTAGATAAAAATTTAGGAGGCATAT
    
```

Supplemental material for: *S. epidermidis* 115 thiopeptide plasmid

CAAatgaactttaataaaaattgatttagacaattggaagagaaaagagatatttaacattatttgaaccaacaacgacttt  
tagtataaccacagaattgatatttagtgttttataaccgaaacataaaacaagaaggatataaaatttaccctgcatttattt  
tcttagtgacaaggtgataaactcaaatacagcttttagaactggttacaatagcgacggagagtttaggttatgtgggataag  
ttagagccactttatacaatttttgatgggtgatctaaaacattctctggatttggactcctgtaaagaatgacttcaaaga  
gttttatgatttatacctttctgatgtagagaaatataatggttcggggaaattgtttcccaaacacctatacctgaaaatg  
cttttctctttctattattccatggacttcatttactgggttaacttaaatatcaataataatagtaattaccttctaccc  
attattacagcaggaaaattcattaataaaaggttaattcaatatattaccgctatctttacaggtacatcattctgttgtga  
tggttatcatgcaggattgtttatgaactctattcaggaattgctcagataggcctaataactgactggcttttataaTATGAGATAA  
TGCCGACTGTACTTTTTACAGTCGGTTTTCTAATGTCACTAACCTGCCCGGTTAGTTGAAGAAGGTTTTTATATTACAGCTCC  
AGATCCTCTACGCCGGACGCATCGTGGCCGGCATCACCGGCGCCACAGGTGCGGTTGCTGGCGCCTATATCGCCGACATCAC  
GATGGGGAAGATCGGGCTCGCCACTTCGGGCTCATGAGCGCTTGTTCGGCGTGGGTATGGTGGCAGGCCCGTGGCCGGGG  
ACTGTTGGGCGCCATCTCCTTGCATGCACCATTCCCTTGGCGCGCGGTGCTCAACGGCCTCAACCTACTACTGGGCTGCTTCC  
TAATGCAGGAGTCGCATAAGGGGAGAGCGTCGACATGGATGAGCGATGATGATATCCGTTTAGGCTGGGCGGTGATAGCTTCTC  
GTTACAGGCAGTACGCCTCTTTCTTTCCAGACCTGAGGGAGGCGGAAATGGTGTGAGGTTCCCGGGGAAAAGCCAAATAGGC  
GATCGCGGGAGTGCTTTATTTGAAGATCAGGCTATCACTGCGGTCAATAGATTTACAAATGTGATGGCTGGACAGCCTGAGGA  
ACTCTCGAACCCGAATGGAAACAACCAGATATTTATGAATCAGCGCGGCTCACATGGCGTGTGCTGGCAAATGCAGGTTTCT  
CCTCTGTCTCTATCAATACGGCAACAAAATGCCTGATGGCAGGTATGACAATAAAGCTGGAGCGGGTTCATTTCAAGTGAAC  
GATGGTAAACTGCAGGCACGATCAATGCCAGGTCTGTAGCTGTGCTTTATCCTGATGATATTGCAAAAGCGCCTCATGTTTT  
CCTTGAGAATTACAAAACAGGTGTAACACATTTCTTCAATGATCAACTGACGATTACCTTGGCGTGCAGATGCGAATACAACA  
AAGCCGTTTATCAAAATCAATAATGGACCAGACGACAGGCGTTAAGGATGGAGATCAATTCACAATCGGAAAAGGAGATCCAA  
TTTGGCAAAACATACACCATCATGTTAAAAGGAACGAACAGTGTGGTGTAAACGAGGACCGAGAAAATACAGTTTTGTAAAAG  
AGATCCAGCGTCGGCCAAAACCATCGGCTATCAAAATCCGAATCATTGGAGCCAGGTAATGCTTATATCTATAAACATGATG  
GGAGCCGAGTAATGAATTGACCGGATCTTGGCCTGGAAAACCAATGACTAAAAATGCAGACGGAAATTTACACGCTGACGCTG  
CCTGCGGACGGATACAACCAACGCAAAAGTGATTTTTAATAATGGCAGCGCCCAAGTGCCCGGTGAGAAATACAGCTGGCTT  
TGATTACGTGCTAAATGGTTTTATATAATGACTCGGGCTTAAGCGTTCTCTTCCCCATTGAGGGCAAGGCTAGACGGGACTTA  
CCGAAAGAAACCATCAATGATGGTTCTTTTTTGTTCATAAATCAGACAAAACCTTTCTCTTGCAAAAGTTTTGTGAAGTGTG  
CACAAATAAATGTGAAATACCTCACAAACAAAAGACATCAAAGAGAAACATACCCTGCAAGGATGCTGATATTGTCTGCAT  
TTGCGCCGGAGCAAAACCAAAAACCTGGTGAGACACGCCTTGAATTAGTAGAAAAGAACTTGAAGATTTTCAAAGGCATCGTTA  
GTGAAGTCATGGCGAGCGGATTTGACGGCATTCTTAGTCGCGACGCGAGGCTGGATGGCCTTCCCCATTATGATTCTTCTC  
GCTTCCGGCGGCATCGGGATGCCCGGTTGACAGCCATGCTGTCCAGGCAGGTAGATGACGACCATCAGGGACAGCTTCAAGG  
ATCGCTCGCGGCTCTTACCAGCCTAACTTCGATCACTGGACCGCTGATCGTCACGGCGATTTATGCCGCTCGCGGAGCACAT  
GGAACGGGTTGGCATGGATTGTAGGCGCCGCCCTATACCTTGTCTGCCTCCCCCGGTTGCGTTCGCGGTGCATGGAGCCGGGCC  
ACCTACTGAAGTGGATTTCTTTAAGCTAGAGGATCGATCTGTATAATAAAGAATAATTATTAATCTGTAGACAAATTTGTA  
GGATGTACTTAAACGCTAACGGTCAGCTTTATTTGAACAGTAATTTAAGTATATGTCCAATCTAGGGTAAGTAAATTTGAGTATC  
AATATAAACTTTATATGAACATAATCAACGAGGTGAAATCATGAGCAATTTGATTAACGGAAAAATACCAATCAAGCGATTC  
AAACATTAATAAATCGTAAAAGATTTATTTGGAAGTTCAATAGTTGGAGTATATCTATTTGGTTCAGCAGTAAATGGTGGTTTTA  
CGCATTAACAGCGATGTAGATGTTCTAGTCGTCGTGAATCATAGTTTACCTCAATTAACCGAAAAAACTAACAGAAAGACT  
AATGACTATATCAGGAAAGATTGGAAATACGGATTCTGTTAGACCCTTGAAGTTACGGTTATAAATAGGAGTGAAGTTGTCC  
CTTGGCAATATCCTCCAAAAGAGAATTTATATACGGTGAGTGGCTCAGGGGTGAATTTGAGAATGGACAAATTCAGGAACCA  
AGCTATGATCCTGATTTGGCTATTGTTTTAGCACAAAGCAAGAAAGAATAGTATTTCTCTATTTGGTCTGATTTCTCAAGTAT  
ACTTGTCTCCGTACCTTTGACAGATATTCGAAGAGCAATTAAGGATTCTTTGCCAGAACTAATTGAGGGGATAAAAGGTGATG  
AGCGTAATGTAATTTAACCCTAGCTCGAATGTGGCAAACAGTGACTACTGGTGAATTAACCGAAAGATGTCGCTGCAGAA  
TGGGCTATACCTCTTTACCTAAAGAGCATGTAACCTTACTGGATATAGCTAGAAAAGGCTATCGGGGAGAGTGTGATGATAA  
GTGGGAAGGACTATATTCAAAGGTGAAAGCACTCGTAAAGTATATGAAAAATCTATAGAACTTCTCTCAATTAGGCTAATTT  
TTATGCAATAACAGGTGCTTACTTTCTGGAGTCTTTAGCAAATTTTTTTTATAGCTGAACTTAGTATTAGTGCCATACT  
CCTCAATCCAAAGCTATTTAGAAAGATTACTATATCCTCAAACAGGCGGTAACCGGCTCTTCATCGGGAATGCGCGCGACC  
TTCAGCATCGCCGCATGTCCCTTGGCGGACGGAAAGTATCCAGCTCGAGGTGGCGAAACCCGACAGGACTATAAAGATACCAGGC  
GTTTCCCCCTGGAAGCTCCCTCGTGCCTCTCTGTTCCGACCTGCCGCTTACCGGATACCTGTCCGCTTTCTCCCTTCGG  
GAAGCGTGGCGCTTCTCATAGCTCAGCTGTAGGTATCTCAGTTCCGGTGTAGGTCGTTCCGCTCCAAGCTGGGCTGTGTGCAC  
GAACCCCCGTTACGCCGACCGCTGCGCTTATCCGGTAACATTCGTCTTGAAGTCCAACCCGTAAGACACGACTTATCGCC  
ACTGGCAGCAGCCACTGGTAACAGGATTAGCAGAGCGAGGTATGTAGGCGGTGCTACAGAGTCTTGAAGTGGTGGCCTAAT  
ACGGCTACACTAGAAGGACAGTATTTGGTATCTGCGCTCTGCTGAAGCCAGTTACCTTCGGAAAAAGAGTTGATAGCTCTTGA  
TCCGGCAAAACAAACCACCGCTGGTAGCGGTGGTTTTTTTTGTTTGAAGCAGCAGATTACGCGCAGAAAAAAGGATCTCAAGA  
AGATCCTTTGATCTTTTCTACGGGTCTGACGCTCAGTGAACGAAAACCTCACGTTAAGGGATTTTGGTTCATGAGATTATCAA

Supplemental material for: *S. epidermidis* 115 thiopeptide plasmid

AAAGGATCTTCACCTAGATCCTTTTAAATTAATAAATGAAGTTTTAAATCAATCTAAAGTATATATGAGTAAACTTGGTCTGAC  
 AGTTACCAATGCTTAATCAGTGAGGCACCTATCTCAGCGATCTGTCTATTTTCGTTTCATCCATAGTTGCCTGACTCCCCGTCGT  
 GTAGATAACTACGATACGGGAGGGCTTACCATCTGGCCCCAGTGTGCAATGATACCGCGAGACCCACGCTCACCGGCTCCAG  
 ATTTATCAGCAATAAACCAGCCAGCCGGAAGGGCCGAGCGCAGAAGTGGTCTTCAACTTTATCCGCTCCATCCAGTCTATT  
 AATTGTTGCCGGGAAGCTAGAGTAAGTAGTTCCGCAAGTTAATAGTTTGCAGCAAGTTGTTGCCATTGCTGCAGGCATCGTGGT  
 GTCACGCTCGTCTTGGTATGGCTTCATTCAGCTCCGGTTCCCAACGATCAAGGCGAGTTACATGATCCCCCATGTTGTGCA  
 AAAAAGCGGTTAGCTCCTTCGGTCTCCGATCGTTGTGAGAAGTAAGTTGGCCGAGTGTATCACTCATGTTTATGGCAGCA  
 CTGCATAATTCTTACTGTTCATGCCATCCGTAAGATGCTTTTCTGTGACTGGTGGTACTCAACCAAGTCATTCTGAGAATA  
 GTGTATGCGGCGACCGAGTTGCTCTTGGCCGGCGTCAACACGGGATAATACCGCGCCACATAGCAGAACTTTAAAAGTGCTCA  
 TCATTGGAAAACGTTCTTCGGGGCGAAAACCTCTCAAGGATCTTACCCTGTTGAGATCCAGTTCGATGTAACCCACTCGTGCA  
 CCCAACTGATCTTCAGCATCTTTTACTTTTACCAGCGTTTCTGGGTGAGCAAAAAACAGGAAGGCAAAATGCCGCAAAAAAGGG  
 AATAAGGGCGACACGGAAATGTTGAATACTCATACTCTTCTTTTCAATATTATTGAAGCATTATCAGGGTTATTGTCTCA  
 TGAGCGGATACATATTTGAATGTATTTAGAAAAATAAACAAATAGGGGTTCCGCGCACATTTCCCCGAAAAGTGCCACCTGAC  
 GTCTAAGAAACATTATTATCATGACATTAACCTATAAAAAATAGGCGTATCACGAGGCCCTTTCGTCTTCAAGAATTAACAAA  
 ATTCTCCAGTCTTCACATCGGTTTGAAGGAGGAAGCGGAAGAATGAAGTAAGAGGGATTTTGGACTCCGAAGTAAGTCTTCA  
 AAAAATCAATAAGGAGTGTCAAGA

**B** Plasmid pRB015 used to generate *B. subtilis* SCK6 *amyE::tclWX-cat* mutant. The plasmid map shows critical features and unique restriction sites, where relevant. The complete nucleotide sequence is provided below with *tclW*, *tclX* and *cat* indicated in lowercase font.

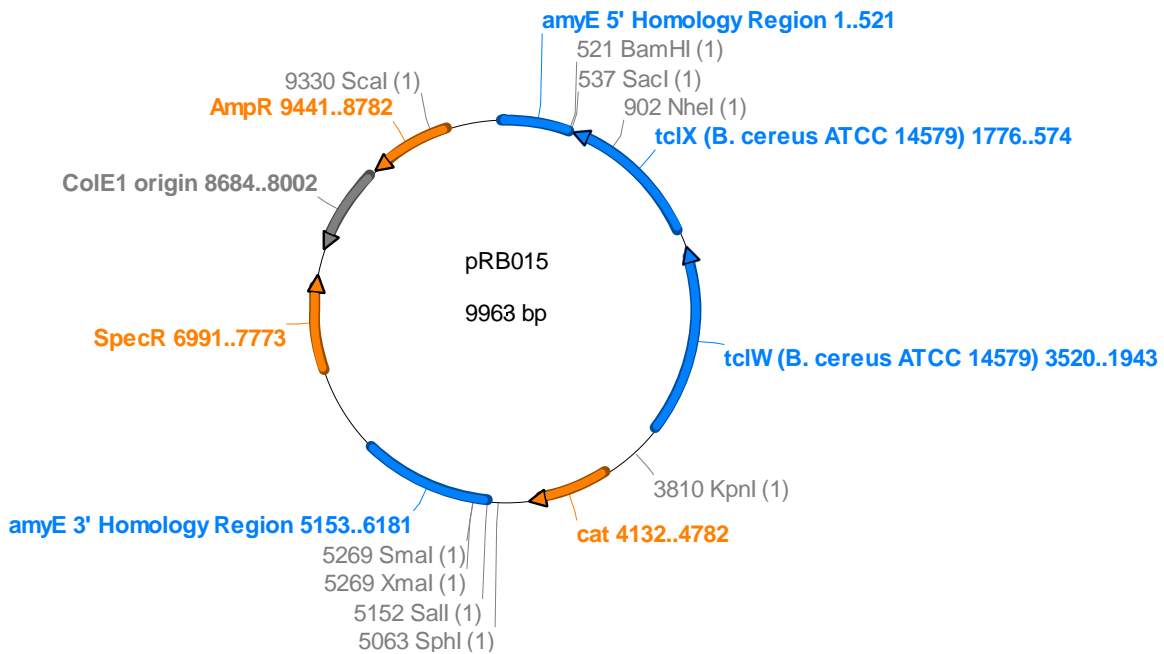

ATGTTTGCAAAACGATTCAAAACCTCTTTACTGCCGTTATTTCGCTGGATTTTTATTGCTGTTTCATTTGGTCTGGCAGGACC  
 GGCGCTGCGAGTGTGAAACGGCGAACAAATCGAATGAGCTTACAGCACCCTCGATCAAAAGCGGAACCATTTTCATGCAT  
 GGAATTGGTCTGTTCAATACGTTAAAACACAATATGAAGGATATTCATGATGCAGGATATACAGCCATTCAGACATCTCCGATT  
 AACCAAGTAAAGGAAGGAATCAAGGAGATAAAAGCATGTGCAACTGGTACTGGCTGTATCAGCCGACATCGTATCAAAATTGG  
 CAACCGTTACTTAGTACTGAACAAGAATTTAAAGAAATGTGTGCAGCCGCTGAAGAATATGGCATAAAGGTCATTGTTGACG  
 CGTCAATCAATCAACCACAGTGATTATGCCGCGATTTCCAATGAGGTTAAGAGTATTCCAACCTGGACACATGGAAACACA  
 CAAATTA AAAACTGGTCTGATCGGATCCACAAGCTTCAGAGCTCTCACTTCGCAAAACCTCTGTATTATAAATATttacactt  
 caaacctcttgcttaatacaatatacattgcgcaaaatagcacgaatatacccagcataaattaacaaaatctctacactaac  
 atatccgacaatggcccaaatattatcattcctagaggaagcgcgcatgaattcgcaatttgtaacaagactgaacatccgtcc  
 gtgattgatggttctactttctcctgcaataaacacagtaactggtgtattgaagcacggcatcggtataccaatataaaaaat  
 taaactactaaatacataataaatatcggtgctattccgagtccaatcataagcagtcacataatgcaaacgtagcgctgtt

Supplemental material for: *S. epidermidis* 115 thiopeptide plasmid

gtagcatacgttacgaaaaccacccacgcgcaatcaatacgcaccagctgcccaccagcactaaaggtcatctcact  
agcagtaagtctccacatttccgccccgaaagaacgagttaccattaaaggtgtaaaaaagcagctggacttattaaatca  
tgatgataatcaataaacgattagccttttaataatacattttcttttaataagagaatccttctttaattccttgtaga  
ttagatttttgcctattctctgcatcaccatgtccctctacttgaatgataagcataactaattccaatcatagccgtaat  
aacatcaataaaaaatggttggttcaatgctggcaatagaaagaatcgccgcaacttgcctgctggagaagaacataattaag  
atgtaatactgctatttattccatttactttcataagatactctttcggaacgatttgcggaattaatgcatcagcgtggc  
gtttgtactcctgttccagctgaacgaatgagtaacacaataaaaagtaaccaatacttttatacctgttaaaaaataaat  
tgctaaaactaacgtcgcaatcgctataattccatccgataacataatcatcttttacggtcataacgatcaatccaaacac  
ctgcaaaacaagatatacgcaatttgtggtagaaaaccgcaaacagttgaaatagtcaacatcactcctgatgatgttgaagg  
gtgataatccatataatcgcgatttgcacgagagaggaacctaacacgaaatagtttgagcggtaaaaaataatataat  
cgttttccaattgttttcaactcatatgtttcacACCCCTTAACTAATCCCGTCTCTATATGAAAGATACTATCTGCCAATC  
AAGATAAAAACCTCGCTTCGTGAGATACGAGTATAATGCTGCCCTTAAACTTAATTAACGCCCTTTTGCAAAGCTTCCTTCGCTT  
CTGCATCTAAATGATTTGTTCGGCTCATCTAAAAttaataagttacaaggtgataataataatccgcaaccccccttaactaatc  
ccgtctctatatgaagatactatctgcccaatcaagataaaaactcgcttctgtgagatacaggtataatgctgcccttaaac  
ttaattaacgccttttgcaagcttcccttgccttctgcatctaaatgatttgcggtcatctaaaaattaataagttacaagg  
tgataataataatccgcacagtttccacttgcattgttccaccaccacttaacgtacgaatcttctgcgaaacgtgcgtatcct  
tcaactccacacgcagctaaatgatggcgtatttcccttcatattcagtttaggaaactgttctgaaataatttgaagcggcgtt  
aaagaatcattgctccaatttaaatcttgcctcataatataccttcttatttgcctgaaaagtgaactctccagaaatact  
atcaatatttccaacgattgttttaataaagtagatttctactccattgaaacctgtaataacaatttttgcctacca  
ttactgaaaaattcaacttggtaagagagcgaagtgtaaccaacttcaaagttatttacttcaagaactgtctgaactgaa  
atgggaagttcctgaaaatgaatagacggtttatgagtaaaaacttgggtggcgcaattctttccatacgtgtaattgttttcg  
acgaccttgcgctatttttgaattcaccacgcaatatttctacgaatatactcttccggtttttcaattttcttttgcctgtg  
cataatattggcgaatataatcttttcgcaaatgctccttttgccttacaataatctgagtttgcggaataacttcttaact  
gttccgaactctacatcacatagcaagaagttacctttccagaaaatcaaaatcatgtgatacagacaataaacgctccttc  
aaaattcctaataaattagcaagccactccacatgctccttatcgagaaaattcgtcgggtcatctagcaataaaaatattag  
gctcttctaataagagcttccgctaaaattacctttgcacgtgcctccttaattcaccatcacacgattcatcccaatc  
acatcaataacctaaacggctgcaccttattcgtataactactactgataaaaaatcatgagcctcagcagcagccttgaat  
ttctgcgctttcaatagttgatttccatctccagtcacgcacttcttccatataaacttgttcaacttcttttccatttcat  
acaaatcataaaaggctcctctttaaataattgagaaatgggtataaccctcatcaatttctgcgctattgatcaagatgtccaatt  
tgaatatttgggtgccactttatgtctcccttatcagaataatttccccaccaatattttcattaatgtgcttttccctgc  
accattctgccccacaattcccatatgtcccttattgcaaatcaaaagaagcatttctgtataataactttatctataaaac  
tatgtgataaaacttcaactttaagtaaaactcatTTTTATTCTCTTTTTCTGAAATTAATAAAGCAGAGAGATAGCGTCAT  
TCGACACTAGCCCTCTGCTTCATGGTTTTTCTATACTACTCCAATTTATAGTAAAGACTCATCGGAATAATATACACAAAGG  
GCCATAGACAAAGCATTGTCTATGGCCCTTAATCTATTTTATACACCAGCTGAAAAACCATAACGAAATAAGCATAGATAAA  
CTATACTTTTTAGAAAAGTTATTCAGCCGATGAATATAGGGGATTTATACCCCTTGATTAAGCTCCGTACAACGGTACCTCG  
AATTCTCATGTTTGACAGCTTATCATCGGCAATAGTTACCCTTATTATCAAGATAAGAAAAGAAAAGGATTTTTCGCTACGCTC  
AAATCCTTTAAAAAACACAAAAGACCACATTTTTAATGTGGTCTTTTATCTTCAACTAAAGCACCCATTAGTTCAACAAA  
CGAAAATTGGATAAAGTGGGATATTTTTAAAATATATATTTATGTTACAGTAATATTGACTTTTAAAAAGGATTGATTCTAA  
TGAAGAAAGCAGACAAGTAAGCCTCCTAAATTCACTTTAGATAAAAAATTTAGGAGGCATATCAAatgaactttaaaaaattg  
atthagacaattggaagagaaaagagatatttaattcattatttgaaccaacaaacgacttttagtataaccacagaaattgat  
attagtgttttataaccgaaacataaaaacaagaaggatataaattttaccctgcatttattttcttagtgacaaggggtgataaa  
ctcaatacagcttttagaactggttacaatagcgacggagagttagggtattgggataagttagagccactttatacaattt  
ttgatgggtgatctaaaacattctctggtatttggactcctgtaagaatgacttcaaagagttttatgatttatacctttct  
gatgtagagaaaataatgggtcgggaaattgtttccaaaacacctatactgaaatgctttttctctttctattattcc  
atggacttcatttactgggtttaacttaaatcaataataatagtaattaccttctaccattattacagcaggaaattca  
ttaataaaggtaattcaatataattaccgctatctttacaggtacatcattctgtttgtgatggttatcatgcaggattgttt  
atgaactctattcaggaattgtcagataggcctaatgactggctttataaTATGAGATAATGCCGACTGTACTTTTTACAGT  
CGTTTTCTAATGTCACTAACCTGCCCGTTAGTTGAAGAAGTTTTTATATTACAGCTCCAGATCCTCTACGCCGGACGCAT  
CGTGCCGGCATTACCGGCCACAGGTGCGGTTGCTGGCGCTATATCGCCGACATCACCGATGGGGAAGATCGGGCTCGCC  
ACTTCGGGCTCATGAGCGCTTGTTCGGCGTGGGTATGGTGGCAGGCCCGTGGCCGGGGGACTGTTGGGCGCCATCTCCTTG  
CATGCACCATTCTTGC GGCGGGTGTCAACGGCTCAACCTACTACTGGGCTGCTTCTTAATGCAGGAGTCGCATAAGGG  
AGAGCGTCGACATGGATGAGCGATGATGATATCCGTTTAGGCTGGGCGGTGATAGCTTCTCGTTACAGGCAGTACGCCCTTTTT  
CTTTTCCAGACCTGAGGGAGGCGGAAATGGTGTGAGGTTCCCGGGGAAAAGCCAAATAGGCGATCGCGGGAGTGCTTTATTTG  
AAGATCAGGCTATCACTGCGGTCAATAGATTTACAATGTGATGGCTGGACAGCCTGAGGAACCTCGAACCCGAATGGAAC  
AACCAGATATTTATGAATCAGCGCGGCTCACATGGCGTTGTGCTGGCAATGCAGGTTTCATCTCTGTCTCTATCAATACGGC

Supplemental material for: *S. epidermidis* 115 thiopeptide plasmid

AACAAAATTGCCTGATGGCAGGTATGACAATAAAGCTGGAGCGGGTTCATTTCAAGTGAACGATGGTAAACTGACAGGCACGA  
TCAATGCCAGGTCTGTAGCTGTGCTTTATCCTGATGATATTGCAAAAGCGCCTCATGTTTTCCCTTGAGAATTACAAAACAGGT  
GTAACACATTCTTCAATGATCAACTGACGATTACCTTGCGTGCAGATGCGAATACAACAAAAGCCGTTTATCAAATCAATAA  
TGGACCAGACGACAGGCGTTTAAAGGATGGAGATCAATTCACAATCGGAAAAGGAGATCCAATTTGGCAAAACATACACCATCA  
TGTTAAAAGGAACGAACAGTGTGGTGAACGAGGACCGAGAAAATACAGTTTTGTTAAAAGAGATCCAGCGTCGGCCAAAACC  
ATCGGCTATCAAAATCCGAATCATTTGGAGCCAGGTAATGCTTATATCTATAAACATGATGGGAGCCGAGTAATGAATTGAC  
CGATCTTGGCCTGGAAAACCAATGACTAAAAATGCAGACGGAAATTTACACGCTGACGCTGCCGCGACACGGATACAACCA  
ACGCAAAAGTGATTTTTAATAATGGCAGCGCCCAAGTGCCCGGTCAGAATCAGCCTGGCTTTGATTACGTGCTAAATGGTTTA  
TATAATGACTCGGGCTTAAGCGGTCTCTTCCCCATTGAGGGCAAGGCTAGACGGGACTTACCAGAAAGAAACCATCAATGATG  
GTTTCTTTTTTGTTCATAAATCAGACAAAACTTTTCTCTTGCAAAAAGTTTGTGAAGTGTTCACAATATAAATGTGAAATACT  
TCACAAAACAAAAGACATCAAAGAGAAAACATACCCTGCAAGGATGCTGATATTGTCTGCATTTGCGCCGGAGCAAAACAAAA  
CCTGGTGAGACACGCCTTGAATTAGTAGAAAAGAACTTGAAGATTTTCAAAGGCATCGTTAGTGAAGTCATGGCGAGCGGATT  
TGACGGCATTCTTAGTCGCGACCGGAGGCTGGATGGCCTTCCCCATTATGATTTCTTCTCGCTCCGCGCGCATCGGGATGC  
CCGCGTTGCAGGCCATGCTGTCCAGGCAGGTAGATGACGACCATCAGGGACAGCTTCAAGGATCGCTCGCGGCTCTTACCAGC  
CTAACTTCGATCACTGGACCGCTGATCGTCACGGCGATTTATGCCGCTCGGGCAGCACATGGAACGGGTTGGCATGGATTGT  
AGGCGCCGCCCTATACCTTGTCTGCCTCCCCGCTTGGCTCGCGGTGCATGGAGCCGGGCCACCTACTGAAGTGGATTCTTT  
AAGCTAGAGGATCGATCTGTATAATAAAGAATAATTTAATCTGTAGACAAATGTGAAAGGATGACTTAAACGCTAACGG  
TCAGCTTTATTGAACAGTAATTTAAGTATATGTCCAATCTAGGGTAAAGTAAATGAGTATCAATATAAACTTTATATGAACAT  
AATCAACGAGGTGAAATCATGAGCAATTTGATTAACGGAAAAATACCAATCAAGCGATTCAAACATTAATAAAATCGTAAAAGA  
TTTATTTGGAAGTTCAATAGTTGGAGTATATCTATTTGGTTCAGCAGTAAATGGTGGTTTACGCATTAACAGCGATGTAGATG  
TTCTAGTCGTGTAATCATAGTTTACCTCAATTAACCGAAAAACTAACAGAAAGACTAATGACTATATCAGGAAAGATT  
GGAAATACGGATTCTGTTAGACCCTTGAAGTTACGGTTATAAATAGGAGTGAAGTGTCCCTTGGCAATATCCTCCAAAAAG  
AGAATTTATATACGGTGAGTGGCTCAGGGGTGAATTTGAGAATGGACAAATTCAGGAACCAAGCTATGATCCTGATTTGGCTA  
TTGTTTTGACACAAAGCAAGAAGAATAGTATTTCTCTATTTGGTCTGATTCATCAAGTATACTTGTCTCCGTACCTTTGACA  
GATATTCGAAGCAATTAAGGATCTTTGCCAGAACTAATTGAGGGGATAAAAAGGTGATGAGCGTAATGTAATTTTAAACCCT  
AGTCGAATGTGGCAACAGTACTACTGGTGAATTTACCTCGAAAGATGTGCTGCAGAATGGGCTATACCTCTTTTACCTA  
AAGAGCATGTAACTTTACTGGATATAGCTAGAAAAGGCTATCGGGGAGAGTGTGATGATAAGTGGGAAGGACTATATTCAAAG  
GTGAAAAGCACTCGTTAAGTATATGAAAAATTTATAGAACTTCTCTCAATTAGGCTAATTTTATTGCAATAACAGGTGCTTA  
CTTTTCTGGAGTTCTTTAGCAAATTTTTTTTATTAGCTGAACCTTAGTATTAGTGCCATACTCCTCCAATCCAAAGCTATTTAG  
AAAGATTACTATATCCTCAAACAGGCGGTAACCGCCTCTTCAATCGGGAATGCGCGCACCTTACAGCATCGCCGGCATGTCCC  
CCTGGCGGACGGGAAGTATCCAGCTCGAGGTGGGCGCGCTTGTGGCGTTTTTCCATAGGCTCCGCCCCCTGACGAGCATC  
ACAAAATCGACGCTCAAGTCAGAGGTGGCGAAACCCGACAGGACTATAAAGATACCAGGCGTTTCCCCCTGGAAGCTCCCTC  
GTGCGCTCTCCTGTTCCGACCTGCCGCTTACCGGATACCTGTCCGCTTTTCTCCCTTCGGGAAGCGTGGCGCTTTCTCATAG  
CTCACGCTGTAGGTATCTCAGTTCCGGTGTAGGTCGTTGCTCCAAGCTGGGCTGTGTGCACGAACCCCCGTTACAGCCGACC  
GCTGCGCCTTATCCGGTAACATCGTCTTGAGTCCAACCCGTAAGACACGACTTATCGCCACTGGCAGCAGCCACTGGTAAC  
AGGATTAGCAGAGCGAGGTATGTAGGCGGTGTACAGAGTCTTGAAGTGGTGGCCTAACTACGGCTACACTAGAAGGACAGT  
ATTTGGTATCTGCGCTCTGCTGAAGCCAGTTACCTTCGAAAAAGAGTTGATAGCTCTTGATCCGGCAAACAAACCACCGCTG  
GTAGCGGTGGTTTTTTTTGTTTGAAGCAGCAGATTACGCGCAGAAAAAAGGATCTCAAGAAGATCCTTTGATCTTTTCTACG  
GGTCTGACGCTCAGTGAACGAAAACTCACGTTAAGGGATTTTGGTTCATGAGATTATCAAAAAGGATCTTACCTAGATCCT  
TTTTAAATTAATAAATGAAGTTTTAAATCAATCTAAAGTATATATGAGTAAACTTGGTCTGACAGTTACCAATGCTTAATCAGTG  
AGGCACCTATCTCAGCGATCTGTCTATTTTCGTTTACCCATAGTTGCCTGACTCCCCGTCGTGTAGATAACTACGATACGGGAG  
GGCTTACCATCTGCCCCAGTGTGCAATGATACCGCGAGACCCACGCTCACCAGGCTCCAGATTTATCAGCAATAAACCCAGCC  
AGCCGGAAGGGCCGAGCGCAGAAGTGGTCTGCAACTTTATCCGCTCCATCCAGTCTATTAATTTGTTGCCGGGAAGCTAGAG  
TAAGTAGTTCGCCAGTTAATAGTTTGCACAACGTTGTTGCCATTGCTGCAGGCATCGTGGTGTACGCTCGTCTGTTGGTATG  
GCTTCATTCAGCTCCGGTTCCCAACGATCAAGGCGAGTTACATGATCCCCATGTTGTGCAAAAAGCGGTTAGCTCCTTCGG  
TCCTCCGATCGTTGTGAGAAGTAAAGTTGGCCGAGTGTATCACTCATGGTTATGGCAGCACTGCATAATTTCTTACTGTCA  
TGCCATCCGTAAGATGCTTTTTCTGTGACTGGTACTCAACCAAGTCATTTGAGAATAGTGTATGCGGCGACCGAGTTGC  
TCTTCCCCGGCGTCAACACGGGATAATACCGCGCCACATAGCAGAACTTTAAAAGTGCTCATCATTGAAAACGTTCTTCCGGG  
GCGAAAACCTCAAGGATCTTACCCTGTTGAGATCCAGTTCGATGTAACCCACTCGTGCACCCAAGTATCTTACGATCTT  
TTACTTTACCAGGCTTTCTGGGTGAGCAAAAACAGGAAGGCAAAATGCCGCAAAAAGGGAAATAGGGCGACACGGAAATGT  
TGAATACTCATACCTTCTTTTTCAATATTATGAAGCATTTATCAGGGTTATGTCTCATGAGCGGATACATATTTGAATG  
TATTTAGAAAAATAAACAAATAGGGGTTCCGCGCACATTTCCCCGAAAAGTGCCACCTGACGCTAAGAAACCATTATTATCA  
TGACATTAACCTATAAAAATAGGCGTATCACGAGGCCCTTTCGCTTCAAGAAATTAACAAAATTTCTCCAGTCTTACATCGGT  
TTGAAAAGGAGGAAGCGGAAGAATGAAGTAAGAGGGATTTTTGACTCCGAAGTAAGTCTTCAAAAATCAATAAGGAGTGTCA  
AGA



Supplemental material for: *S. epidermidis* 115 thiopeptide plasmid

C Plasmid pRB029 used to generate *B. subtilis* 168  $\Delta rplK::rplK$ -*cat* mutant (PB213). The plasmid map shows critical features and unique restriction sites, where relevant. The complete nucleotide sequence is provided below with *rplK* and *cat* shown in lowercase font.

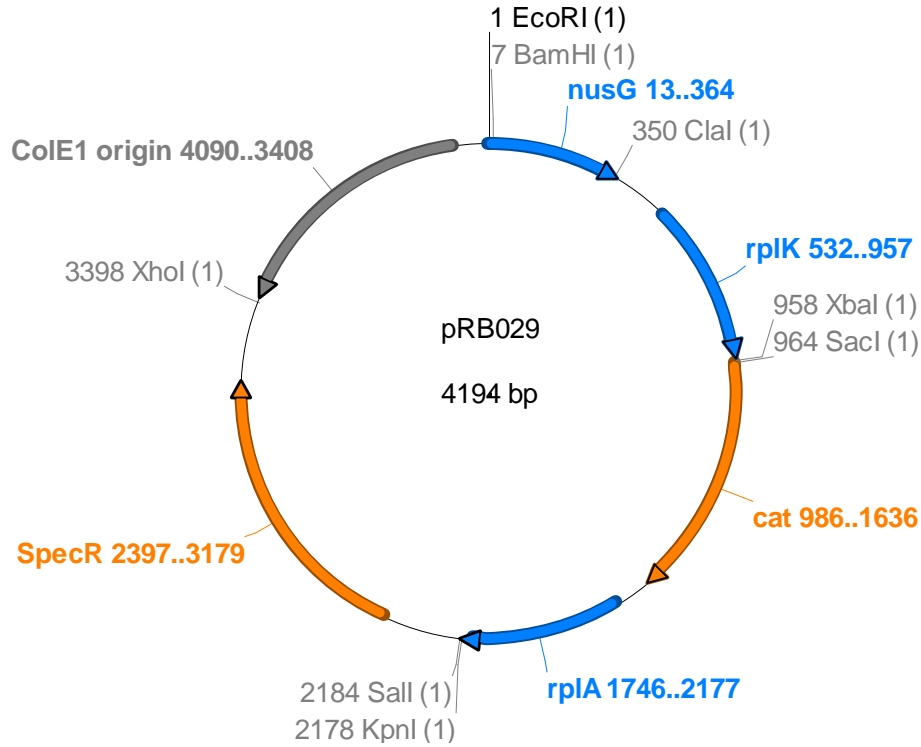

```

GAATTCGGATCCCCCTGGTTATGTGCTTGTGAAATTGTAATGACAGACGACTCTTGGTATGTCGTCCGCAACACGCCGGGCG
TTACTGGATTTCGTAGGATCTGCCGGGTCAGGTTCAAACCGACGCCGCTTCTCCGGGGAAGCAGAAACCATTCTGAAGAGA
ATGGGCATGGATGAACGAAAACTGATATTGACTTTGAACTGAAAGAGACAGTCAAAGTAATAGACGGACCTTTTGCTAACTT
TACAGGATCAATTGAAGAGATTGATTATGATAAAAGCAAGGTCAAAGTTTTTCGTTAATATGTTTGGCCGTGAAACGCCGGTTG
AGCTGGAATTTACCCAAATCGATAAATTGTAATGTGAAAAAAGCTGAAATTCGATATATAAATGATAATATAGCAAAGGTAC
GTCTTGACTTATCCAAGGCAACTAGCATGATATTTTCGTCATTCATATAAAGAATGAAACCTTGAGTGGGAGGGTTTACCCTA
TTACCACATCACGGACTTAAGGAGGTGTGTCTCgtggctaaaaaagtagttaaagttgtaaaattgcaaatcctgctggaaa
agctaaccagcaccaccagttggacctgcacttggccaagccggtgtaaacatcatgggattctgtaaggagtttaacgctc
gtacagctgaccaagctggttttaacattcctggtgaaatctcggtttacgaagaccggttcatttaccattttatacaaaaact
ccacctgctgcagattgcttaaaaaagcagctggaattgagctcgtggttctggtgaaccaaaccgtaataaagtggaaccgt
taagcgcgataaagtacgcgaaatcgctgaaacgaaaatgcctgacttaaacgcagcagacgttgaagcggcaatgcgcatgg
ttgaaggactgcccgcagatgggtattgtaatcgaggattaaTCTAGAGAGCTCTTAGGAGGCATATCAAatgaaactttaa
taaaattgatttagacaattggaagagaaaagagatatttaacatttattgaaccaacaacgacttttagtataaccacag
aaattgatattagtgttttataccgaaacataaaacaagaaggatataaaatctaccctgcatttattttcttagtgacaagg
gtgataaactcaaacacagcttttagaactggttacaatagcgcagggagaggttaggttattgggataaggttagagccacttta
tacaatTTTTgatggtgatctaaaacattctcgtgatttggactcctgtaagaatgacttcaaagagttttatgatttat
acctttctgatgtagagaaatataatggttcgggaaattggttccaaaacacctataacctgaaaatgctttttctctttct
attattccatggacttcatttactgggttaacttaaatatcaataataatagtaattacccttaccattattacagcag
aaaattcattaataaaggtaattcaatatatttaccgctatctttacaggtacatcattctgtttgatggttatcatgacag
gattgtttatgaactctattcaggaattgtcagataggcctaatactgactggctttataaTATGAGATAATGCCGACTGTACCT
TGTCGGGTTGCGAGTTTTAACAAAGTTCGCAACCCTTATTCGTGGGAGGTTATCCGCTATAACCACATAAGGAGGAAATTTTA
AAATGGCTAAAAAAGGTAAGTACGTTGAAGCTGCTAAGCTTGTAGACCGTTCTAAAGCTTACGACGCTCTGAAGCAGTA
GCTCTCGTTAAAAAACAACACAGCTAAATTCGACGCTACAGTTGAAAGTGGCTTTCCGTTTTAGGGGTTGACCTCGTAAAAA
CGACCAGCAAATCCGTGGAGCAGTTGTGCTTCCAAACGGAACCTGTAAGCTCAGCGGTTCTCGTTTTTCGAAAAGGCGAAA
AAGCGAAAGAAGCTGAAGCTGCTGGTGCAGATTTTCGTAGCGGATCTGACTACATCAACAAAATTCACAAGGCTGGTTCGAT
    
```

Supplemental material for: *S. epidermidis* 115 thiopeptide plasmid

TTCGATGTTATCGTAGCTACACCTGACATGATGGGTGAAGTTGGTAAAATCGGTCGTGTACTTGGACCAAAGGTTTAAATGCC  
 GAACCCATAAACTGGTACAGGTACCGTCGACCACCTACTGAAGTGGATTTCTTTAAGCTAGAGGATCGATCTGTATAATAAAG  
 AATAATTATTAATCTGTAGACAAAATTGTGAAAGGATGTACTTAAACGCTAACGGTCAGCTTTATGAACAGTAATTTAAGTAT  
 ATGTCCAATCTAGGGTAAGTAAATTTGAGTATCAATATAAACTTTATATGAACATAATCAACGAGGTGAAATCATGAGCAATTT  
 GATTAACGGAAAAATACCAAATCAAGCGATTCAAACATTAATAAATCGTAAAAGATTTATTTGGAAAGTTCAATAGTTGGAGTAT  
 ATCTATTTGGTTTACGAGTAAATGGTGGTTTACGCATTAACAGCGATGTAGATGTTCTAGTCGTCGTGAATCATAGTTTACCT  
 CAATTAACTCGAAAAAACTAACAGAAAGACTAATGACTATATCAGGAAAGATTTGGAAATACGGATTCTGTTAGACCACTTGA  
 AGTTACGGTTATAAATAGGAGTGAAGTTGTCCCTTGGCAATATCCTCCAAAAAGAGAATTTATATACGGTGAGTGGCTCAGGG  
 GTGAATTTGAGAAATGGACAAATTCAGGAACCAAGCTATGATCCTGATTTGGCTATTGTTTTAGCACAAGCAAGAAAGAATAGT  
 ATTTCTCTATTTGGTCTGATTCTTCAAGTATACTTGTCTCCGTACCTTTTGACAGATATTCGAAGAGCAATTAAGGATTCTTT  
 GCCAGAACTAATTTAGGGGATAAAAAGGTGATGAGCGTAATGTAATTTTAAACCTAGCTCGAATGTGGCAAACAGTACTACTG  
 GTGAAATTACCTCGAAAGATGTCGCTGCAGAAATGGGCTATACCTCTTTTACCTAAAGAGCATGTAACCTTACTGGATATAGCT  
 AGAAAAGGCTATCGGGGAGAGTGTGATGATAAGTGGGAAGGACTATATTCAAAGGTGAAAGCACTCGTTAAGTATATGAAAA  
 TTCTATAGAACTTCTCTCAATTAGGCTAATTTTATTGCAATAACAGGTGCTTACTTTTCTGGAGTTCTTTAGCAAATTTTTT  
 TATTAGCTGAACCTTAGTATTAGTGGCCATACTCCTCCAATCCAAAGCTATTTAGAAAAGATTACTATATCCTCAAACAGGCGGT  
 AACCGGCCTCTTCATCGGGAATGCGCGGACCTTCAGCATCGCCGGCATGTCCCCCTGGCGGACGGGAAGTATCCAGCTCGAG  
 GTCGGGCCCGCTTGTCTGGCGTTTTTCCATAGGCTCCGCCCCCTGACGAGCATCACAAAAATCGACGCTCAAGTCAGAGGTGG  
 CGAAACCCGACAGGACTATAAAGATAACAGGCGTTTTCCCCCTGGAAAGCTCCCTCGTGCCTCTCCTGTTCCGACCCTGCCGCT  
 TACCGGATACCTGTCGCTTTTCTCCCTTCGGGAAGCGTGGCGCTTCTCATAGCTCACGCTGTAGGTATCTCAGTTCGGTGT  
 AGGTCGTTTCGCTCAAGCTGGGCTGTGTGCACGAACCCCCGTTTACGCCGACCGCTGCGCCTTATCCGGTAACTATCGTCTT  
 GAGTCCAACCCGGTAAGACACGACTTATCGCCACTGGCAGCAGCCACTGGTAAACAGGATTAGCAGAGCGAGGTATGTAGGCGG  
 TGCTACAGAGTTCTTGAAGTGGTGGCCTAACTACGGCTACACTAGAAGGACAGTATTTGGTATCTGCGCTCTGCTGAAGCCAG  
 TTACCTTCGGAAAAAGAGTTGATAGCTCTTGATCCGGCAAACAACCACCGCTGGTAGCGGTGGTTTTTTTTGTTTGAAGCCAG  
 CAGATTACGCGCAGAAAAAAGGATCTCAAGAAGATCCTTTGATCTTTTCTACGGGTCTGACGCTCAGTGGAACGAAAACTC  
 ACGTTAAGGGATTTTGGTCATGAGATTATCAAAAAGGATCTTACCTAGATCCTTTTAAATTAATAAATGAAGTTTTAAATCAA  
 TCTAAAGTATATATGAGTAAACTTGGTCTGACAGTTACCAATGC

D Plasmid pRB031 used to generate *B. subtilis* 168  $\Delta rplK::cat$  mutant (PB230). The plasmid map shows critical features and unique restriction sites, where relevant. The complete nucleotide sequence is provided below with *cat* shown in lowercase font.

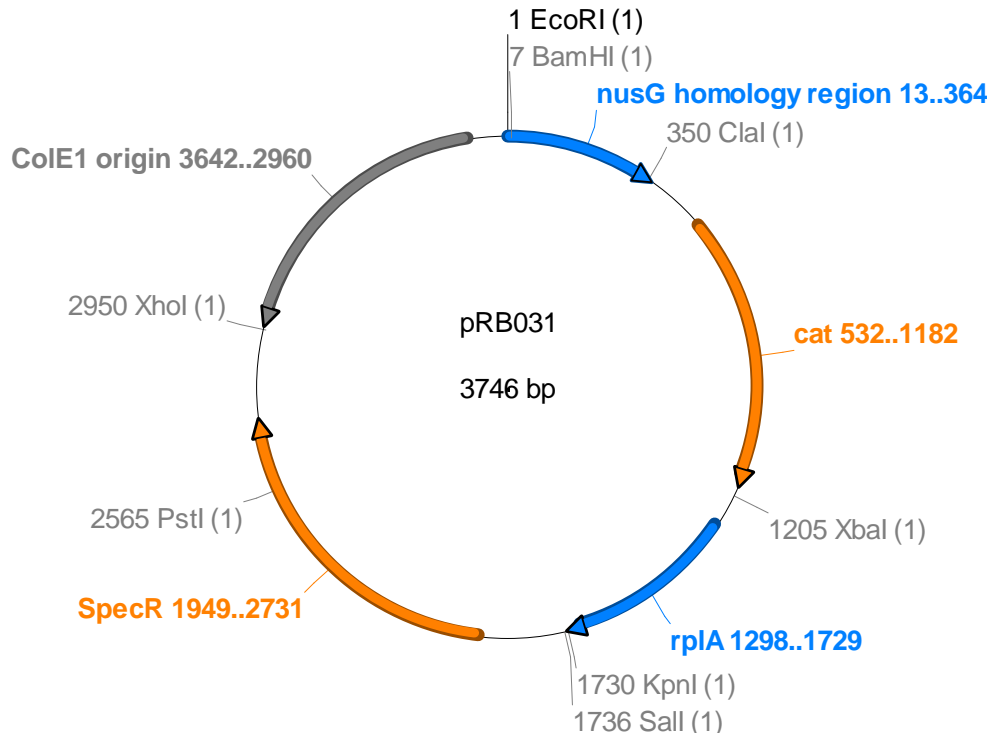

Supplemental material for: *S. epidermidis* 115 thiopeptide plasmid

GAATTCGGATCCCCCTGGTTATGTGCTTGTGAAATTGTAATGACAGACGACTCTTGGTATGTCGTCGCCAACACGCCGGGCG  
TTACTGGATTTCGTAGGATCTGCCGGTCAGGTTCAAACCGACGCCGCTTCTCCGGGGGAAGCAGAAACCATTCTGAAGAGA  
ATGGGCATGGATGAACGAAAACTGATATTGACTTTGAACTGAAAGAGACAGTAAAGTAATAGACGGACCTTTTGCTAACTT  
TACAGGATCAATTGAAGAGATTGATTATGATAAAAAGCAAGGTCAAAGTTTTTCGTTAATATGTTTGGCCGTGAAACGCCGGTTG  
AGCTGGAATTTACCAAATCGATAAATTGTAATGTGAAAAAATGAAATTGCTATATATAAATGATAATATAGCAAAGGTAC  
GTCTTGGACTTATCCAAGGCAACTAGCATGATATTTTCGTCATTCATATAAAGAATGAAACCTTGAGTGGGAGGTTTACCCTA  
TTACCACATCACGGACTTAAGGAGGTGTGTCTCatgaactttaataaaattgatattagacaattggaagagaaaagagatatt  
taatcattatttgaaaccaacaacgacttttagtataaccacagaaattgatattagtggtttataccgaaacataaaacaag  
aaggatataaattttaccctgcatttatcttagtgacaaggtgataaactcaaatacagcttttagaactgggtacaat  
agcgacggagagttagggtattgggataagttagagccactttatacaattttgatgggtgatctaaaacattctctgggtat  
ttggactcctgtaagaatgacttcaaagagtttatgatattatacctttctgatgtagagaaataatggttcggggaat  
tgttcccaaacacctatacctgaaaatgcttttctctttctattattccatggacttcattactgggttaacttaaat  
atcaataataatagtaattaccttctaccattattacagcaggaaaattcattaataaaggaattcaatataattaccgct  
atctttacaggtacatcattctgtttgtgatggttatcatgcaggattggttatgaaactctattcaggaattgtcagataggc  
ctaatgactggcttttataaATAGAGATAATGCCGACTGTACTCTAGACTTGTCCGGTTCGCGAGTTTAAACAAGTTCGCAACC  
CTTATTCGTGGGAGGTTATTCGCTATAACCACATAAGGAGGAAATTTAAAAATGGCTAAAAAAGGTAAAAAGTACGTTGAAG  
CTGCTAAGCTTGTAGACCGTCTAAAGCTTACGACGTCTCTGAAGCAGTAGCTCTCGTTAAAAAACAACACAGCTAAATTC  
GACGCTACAGTTGAAGTGGCTTTCCGTTTAGGGGTTGACCCTCGTAAAAACGACCAGCAAATCCGTGGAGCAGTTGTGCTTCC  
AAACGGAACCTGGTAAAACTCAGCGCTTCTCGTTTTCGCAAAAGGCGAAAAAGCGAAAGAAGCTGAAGCTGCTGGTGCAGATT  
TCGTAGGCGATACTGACTACATCAACAAAATCAACAAGGCTGGTTCGATTCGATGTTATCGTAGCTACACCTGACATGATG  
GGTGAAGTTGGTAAAAATCGGTCGTGACTTTGGACAAAAGGTTAATGCCGAACCTAAAACGGTACAGGTACCGTCGACCA  
CCTACTGAAGTGGATTCTTTAAGCTAGAGGATCGATCTGTATAATAAAGAATAATTATTAATCTGTAGACAAATGTGAAAG  
ATATAAACTTTATATGAACATAATCAACGAGGTGAAATCATGAGCAATTTGATTAAACGAAAAATAACAACTCAAGCGATTCA  
AACATAAAAATCGTAAAAAGATTTATTTGGAAGTTCAATAGTTGGAGTATATCTATTTGGTTCAGCAGTAAATGGTGGTTTAC  
GCATTAACAGCGATGTAGATGTTCTAGTCGTGTAATCATAGTTTACCTCAATTAACCTCGAAAAAATAACAGAAAGACTA  
ATGACTATATCAGAAAGATTGGAATACGGATCTGTGTTAGACCACTTGAAGTTACGGTTATAAATAGGAGTGAAGTTGTCCC  
TTGGCAATATCCTCCAAAAAGAGAATTTATATACGGTGAGTGGCTCAGGGGTGAATTTGAGAATGGACAAATTCAGGAACCAA  
GCTATGATCCTGATTTGGCTATTGTTTTAGCACAAAGAAAGAAATAGTATTTCTCTATTTGGTCTGATTTCTCAAGTATA  
CTTGCTCCTGACTTTTACAGATATTCGAAGACAATTAAGGATTCTTTGCCAGAACTAATTGAGGGGATAAAAGGTGATGA  
GCGTAATGTAATTTTAAACCCTAGCTCGAATGTGGCAACAGTACTACTGGTGAATTACCTCGAAAGATGTCGCTGCAGAAT  
GGGCTATACCTCTTTTACCTAAAGAGCATGTAACCTTACTGGATATAGCTAGAAAAGGCTATCGGGGAGAGTGTGATGATAAG  
TGGGAAGGACTATATCAAAGGTGAAAGCACTCGTTAAGTATATGAAAAATCTATAGAACTTCTCTCAATTAGGCTAATTT  
TATTGCAATAACAGGTGCTTACTTTTCTGGAGTTCTTTAGCAAAATTTTTTTTATTAGCTGAACTTAGTATTAGTGGCCATACTC  
CTCCAATCAAAGCTATTTAGAAAGATTACTATATCCTCAAACAGGCGGTAACCGGCCTCTTCATCGGGAATGCGCGGACCT  
TCAGCATCGCCGGCATGTCCCCCTGGCGGACGGGAAGTATCCAGCTCGAGGTGGGCGCGCTGCTGGCGTTTTTCCATAGGC  
TCCGCCCCCTGACGAGCATCACAAAAATCGACGCTCAAGTCAGAGGTGGCGAAACCCGACAGGACTATAAAGATACCAGGCG  
TTCCCCCTGGAAGCTCCCTCGTGCCTCTCCTGTTCCGACCTGCGGCTTACCGGATACCTGTCCGCCTTTCTCCCTTCGGG  
AAGCGTGGCGCTTCTCATAGCTCAGCTGTAGGTATCTCAGTTCGGTGTAGGTGCTTCGCTCCAAGCTGGGCTGTGTGCACG  
AACCCCCGTTACGCCCAGCGCTGCGCCTTATCCGGTAACTATCGTCTTGTAGTCCAACCCGGTAAAGACACGACTTATCGCCA  
CTGGCAGCAGCCACTGGTAAACAGGATTAGCAGAGCGAGGTATGTAGGCGGTGCTACAGAGTCTTGAAGTGGTGGCCTAACTA  
CGGTACACTAGAAGGACAGTATTTGGTATCTGCGCTCTGCTGAAGCCAGTTACCTTCGGAAAAAGAGTTGATAGCTCTTGAT  
CCGGCAAACAACCACCGCTGGTAGCGGTGGTTTTTTTGTGTTGCAAGCAGCAGATTACGCGCAGAAAAAAGGATCTCAAGAA  
GATCCTTTGATCTTTCTACGGGTCTGACGCTCAGTGAACGAAAATCACGTTAAGGGATTTGGTCATGAGATTATCAA  
AAGGATCTTACCTAGATCCTTTAAATTAATAAATGAAGTTTTAAATCAATCTAAAGTATATATGAGTAACTTGGTCTGACA  
GTTACCAATGC

Supplemental material for: *S. epidermidis* 115 thiopeptide plasmid

E Plasmid pRB030 used to generate *B. subtilis* 168  $\Delta rplK::rplK\Delta P22$ -*cat* mutant (PB214). The plasmid map shows critical features and unique restriction sites, where relevant. The complete nucleotide sequence is provided below with *rplK* $\Delta P22$  and *cat* shown in lowercase font.

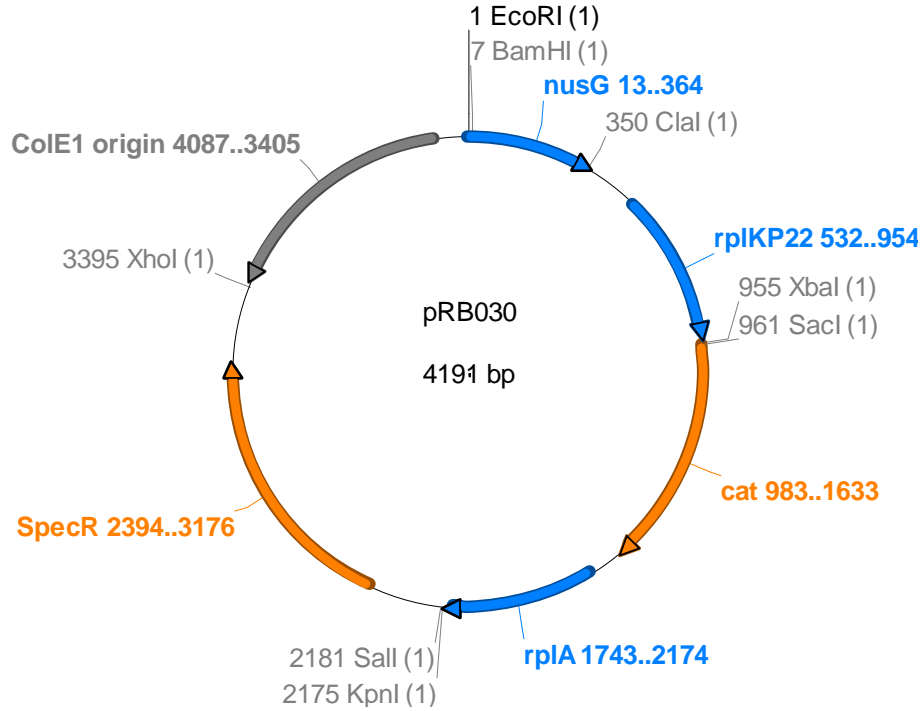

```

GAATTCGGATCCCCCTGGTTATGTGCTTGTGAAATTGTAATGACAGACGACTCTTGGTATGTCGTCGCCAACACGCCGGGGC
TTACTGGATTCGTAGGATCTGCCGGGTCAGGTTCAAAACCGACGCCGCTTCTTCCGGGGAAGCAGAAACCATTCTGAAGAGA
ATGGGCATGGATGAACGAAAACTGATATTGACTTTGAACTGAAAAGAGACAGTGAAAGTAATAGACGGACCTTTTGCTAACTT
TACAGGATCAATTGAAGAGATTGATTATGATAAAAAGCAAGGTCAAAGTTTTTCGTTAATATGTTTGGCCGTGAAACGCCGGTTG
AGCTGGAATTTACCCAAATCGATAAATTGTAATGTGAAAAAAGCTTGAATTTGCTATATATAAATGATAATATAGCAAAGGTAC
GTCTTGACTTATCCAAGGCAACTAGCATGATATTTTCGTCATTCATATAAAGAATGAAACCTTGAGTGGGAGGGTTTACCCTA
TTACCACATCACGACTTAAGGAGGTGTGTCTCgtggctaaaaaagtagttaaagttgtaaaattgcaaattcctgctggaaa
agctaaaccagcaccagttggacctgcacttggctcaagccggtgtaacatcatgggattctgtaaggagtttaacgctcgta
cagctgaccaagctggtttaatcattcctgttgaaatttcggtttacgaagaccggttcatttacatttattacaaaaactcca
cctgctgcagatttgcttaaaaaagcagctggaattgagctcgttctggtgtaaccaaaccgtaataaagtggaaccggttaa
gcgcgataaagtagcggaaatcgctgaaacgaaaatgcctgacttaaacgcagcagacggttgaaagcggcaatgcgcatggttg
aagtagctgcccgcagtagtggtattgtaatcgaggattaaTCTAGAGAGCTCTTAGGAGGCATATCAAatgaactttaataa
aattgatttagacaattggaagagaaaagagatatttaattcattttgaaaccaaaaacgacttttagtataaacacagaaa
ttgatattagtgttttataccgaaacataaaaacaagaaggatataaattttaccctgcatttattttcttagtgacaaggggtg
ataaactcaaatacagcttttagaactggttacaatagcgacggagagttaggttattgggataagttagagccactttatatac
aatttttgatggtgatctaaaacattcctcgttatttgactcctgtaagaatgacttcaaagagttttatgatttatacc
ttctgatgtagagaaatataatggttcgggaaattggttcccaaacacctataacctgaaaatgctttttctctttctatt
attccatggactcatttactggtttaaacttaaatatcaataataatagtaattaccttctaccattattacagcaggaaa
attcattaataaaggtaattcaatatatttaccgctatctttacaggtacatcattctgtttgtgatggttatcatgcaggat
tgtttatgaactctattcaggaattgtcagataggcctaagtagctggcttttataaTATGAGATAATGCCGACTGTACCTTGT
CGGGTTGCGAGTTTAAACAAGTTCGCAACCCCTTATTCGTGGGAGGTTATTCCGCTATAACCACATAAGGAGGAAAATTTAAAA
TGGCTAAAAAAGGTAAAAAGTACGTTGAAGCTGCTAAGCTTGTAGACCGTTCTAAAGCTTACGACGTCTCTGAAGCAGTAGCT
CTCGTTAAAAAACAACACAGCTAAATTCGACGCTACAGTTGAAGTGGCTTTCGTTTAGGGGTTGACCCCTCGTAAAAACGA
CCAGCAAATCCGTGGAGCAGTTGTGCTTCCAAACGGAAGTGGTAAAACTCAGCGCGTTCTCGTTTTCGCAAAAAGGCGAAAAAG
CGAAAGAAGCTGAAGCTGCTGGTGCAGATTTTCGTAGGCGATACTGACTACATCAACAAAATTCAAACAAGGCTGGTTCGATTT
    
```

Supplemental material for: *S. epidermidis* 115 thiopeptide plasmid

GATGTTATCGTAGCTACACCTGACATGATGGGTGAAGTTGGTAAAATCGGTCGTGTAAGTGGACAAAAGGTTTAAATGCCGAA  
 CCCTAAAACCTGGTACAGGTACCGTACGACCACCTACTGAAGTGGATTTCTTTAAGCTAGAGGATCGATCTGTATAATAAAGAAT  
 AATTATTAATCTGTAGACAAATTTGTGAAAGGATGTAAGTAAACGCTAACGGTCAGCTTTATTGAACAGTAATTTAAGTATATG  
 TCCAATCTAGGGTAAAGTAAATGAGTATCAATATAAACTTTATATGAACATAATCAACGAGGTGAAATCATGAGCAATTTGAT  
 TAACGGAAAAATACCAAATCAAGCGATTCAAACATTAATAAATCGTAAAAGATTTATTTGGAAGTTCAATAGTTGGAGTATATC  
 TATTTGGTTTCAGCAGTAAATGGTGGTTTACGCATTAACAGCGATGTAGATGTTCTAGTCGTGTAATCATAGTTTACCTCAA  
 TTAAGTTCGAAAAAACTAACAGAAAGACTAATGACTATATCAGGAAAGATTGGAATACGGATCTGTTAGACCCTTGAAGT  
 TACGGTTATAAATAGGAGTGAAGTTGTCCCTTGGCAATATCCTCCAAAAAGAGAATTTATATACGGTGAAGTGGCTCAGGGGTG  
 AATTTGAGAATGGACAAATTCAGGAACCAAGCTATGATCCTGATTTGGCTATTGTTTTAGCACAAAGCAAGAAAGAATAGTATT  
 TCTCTATTTGGTCTGATTTCTTCAAGTATACTTGTCTCCGTACCTTTGACAGATATTCGAAGAGCAATTAAGGATTTCTTTGCC  
 AGAACTAATTGAGGGGATAAAAGGTGATGAGCGTAATGTAATTTTAAACCTAGCTCGAATGTGGCAAACAGTGACTACTGGTG  
 AAATTACCTCGAAAGATGTCGCTGCAGAATGGGCTATACCTCTTTTACCTAAAGAGCATGTAACCTTTACTGGATATAGCTAGA  
 AAAGGCTATCGGGGAGAGTGTGATGATAAGTGGGAAGGACTATATTCAAAGGTGAAAGCACTCGTTAAGTATATGAAAAATTC  
 TATAGAAACTTCTCTCAATTAGGCTAATTTTATTGCAATAACAGGTGCTTACTTTTCTGGAGTTCTTTAGCAAATTTTTTTTAT  
 TAGTGAACCTTAGTATTAGTGGCCATACTCCTCCAATCCAAAGCTATTTAGAAAGATTACTATATCCTCAAACAGGCGGTAAC  
 CGGCCTCTTCATCGGGAATGCGCGGACCTTCAGCATCGCCGGCATGTCCCTTGGCGGACGGGAAGTATCCAGCTCGAGGTC  
 GGGCCGCGTTGCTGGCGTTTTTCCATAGGCTCCGCCCTGACGAGCATCACAAAAATCGACGCTCAAGTCAGAGGTGGCGA  
 AACCCGACAGGACTATAAAGATACAGGCGTTTTCCCTGGAAGCTCCCTCGTGCCTCTCCTGTTCCGACCTGCGCTTAC  
 CGGATACCTGTCCGCTTTCTCCCTTCGGGAAGCGTGGCGCTTTCTCATAGCTCACGCTGTAGGTATCTCAGTTCCGGTGTAGG  
 TCGTTTCGCTCCAAGCTGGGCTGTGTGCACGAACCCCGTTCAGCCGACCGCTGCGCTTATCCGGTAACTATCGTCTTGAG  
 TCCAACCCGGTAAAGACACGACTTATCGCCACTGGCAGCAGCCACTGGTAACAGGATTAGCAGAGCGAGGTATGTAGGCGGTGC  
 TACAGAGTTCTTGAAGTGGTGGCTAACTACGGCTACACTAGAAGGACAGTATTTGGTATCTGCGCTCTGCTGAAGCCAGTTA  
 CCTTCGGAAAAAGAGTTGATAGCTCTTGATCCGGCAAACAACACCCGCTGGTAGCGGTGGTTTTTTTGTGTTGCAAGCAGCAG  
 ATTACGCGCAGAAAAAAGGATCTCAAGAAGATCCTTTGATCTTTTCTACGGGTCTGACGCTCAGTGAACGAAAACTCACG  
 TTAAGGGATTTTGGTCATGAGATTATCAAAAAGGATCTTCACCTAGATCCTTTTAAATTAATAAATGAAGTTTTAAATCAATCT  
 AAAGTATATATGACTAACTTGGTCTGACAGTTACCAATGC

F Plasmid pRB024 used to generate *B. subtilis* 168  $\Delta rplK::tclQ$ -*cat* mutant (PB215). A plasmid map shows critical features and unique restriction sites, where relevant. The complete nucleotide sequence is provided below with *tclQ* and *cat* shown in lowercase font.

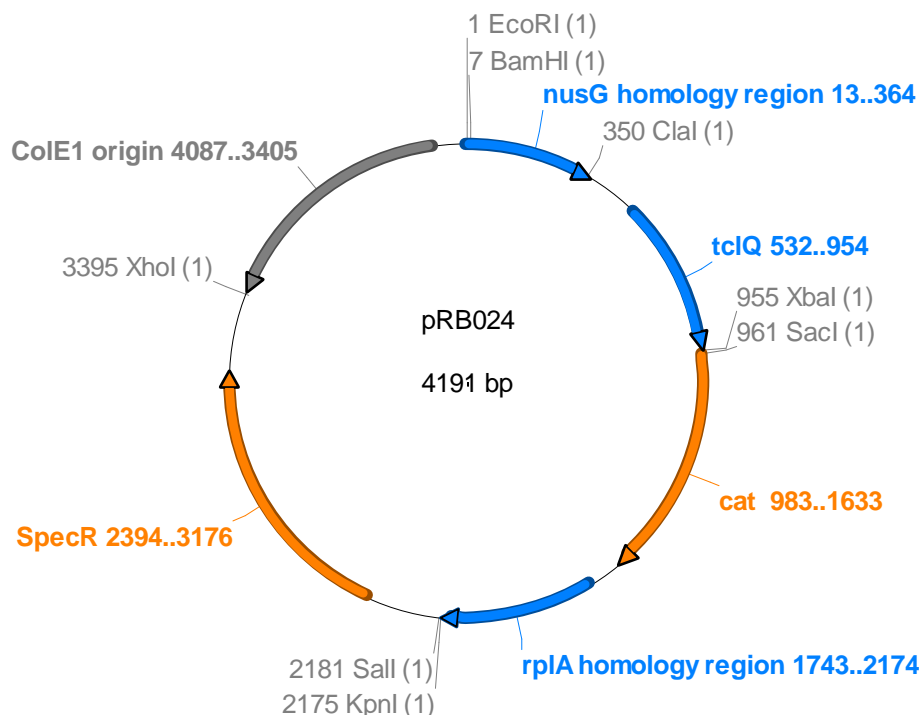

## Supplemental material for: *S. epidermidis* 115 thiopeptide plasmid

GAATTCGGATCCCCCTGGTTATGTGCTTGTGAAATGTAATGACAGACGACTCTTGGTATGTCGTCGCAACACGCCGGCGTTA  
CTGGATTTCGTAGGATCTGCCGGGTCAAGTTCAAAACCGACGCCGCTCTTCCGGGGGAAGCAGAAACCATTCTGAAGAGAATGGGC  
ATGGATGAACGAAAACTGATATTGACTTTGAACTGAAAGAGACAGTGAAGTAATAGACGGACCTTTTGCTAACTTTACAGGATC  
AATTGAAGAGATTGATTATGATAAAAGCAAGGTCAAAGTTTTTCGTTAATATGTTTGGCCGTGAAACGCCGGTTGAGCTGGAATTTA  
CCCAATCGATAAATGTAATGTGAAAAACTTGAATTTGCTATATATAAATGATAATATAGCAAAGGTACGCTCTGGACTTATCC  
AAGGCAACTAGCATGATATTTTCGTCATTTCATATAAAGAATGAAACCTTGAGTGGGAGGGTTTACCCTATTACCACATCACGGACTT  
AAGGAGGTGTGTCTCatggcaaaagctataaagcaaattattaatattcaattagaagctggaaaagcttctccagcacctccggt  
aggtactgcattagcccagcaggagttaatattatggagtttgaacacaatataatgctcagactaaagaaaagctcggggtta  
ttcctgcagaaattacggtatatgaagatcgaagctttaactttatactaaaaactcctcccacagctgaattaataaaagagaaa  
gcacatatcaataaaggatctggtgttccaaacaagaaattgtaggaagtatttcaaagaaagattacaagagattgcagaaat  
aaaaatgcctgatctgaatgcaagtcttattgaaacagcaatgtaaatgattgaaggtactgctagaaatattgggagtcaaagtag  
aagattagTCTAGAGAGCTCTTAGGAGGCATATCAAatgaactttaataaaattgatttagacaattggaagagaaaagagatatt  
taatcattatttgaaccaacaaacgacttttagtataaccacagaaattgatattagtgtttataaccgaaacataaaaacaagaag  
gatataaaattttacctgcatttttttcttagtgacaaggtgataaactcaaatacagcttttagaactggttacaatagcgac  
ggagagtttaggttattgggataagtttagagccactttatacaatttttgatggtgtatctaaaacattctctggtatttggactcc  
tgtaagaatgacttcaaagagttttatgatttatacctttctgatgtagagaaatataatggttcggggaaattgtttcccaaaa  
cacctatacctgaaaaatgctttttctctttctattatccatggacttcatttactgggttaacttaaatatcaataataatagt  
aattaccttctaccattattacagcaggaatcattaataaaggtaattcaatatatttaccgctatctttacaggtacatca  
ttctgtttgtgatggttatcatgacaggttattatgaactctattcaggaattgtcagataggcctaagactggcttttataaT  
ATGAGATAATGCCGACTGTACCTTGTCCGGTTGCGAGTTTTAACAAAGTTCGCAACCCTTATTCGTGGGAGGTTATCCGCTATAAC  
CACATAAGGAGGAAATTTTAAAAAGGCTAAAAAAGTAAAAAGTACGTTGAAGCTGCTAAGCTTGTAGACCGTTCTAAAGCTTACG  
ACGTCCTGAAGCAGTAGCTCTCGTTAAAAAACAAACACAGCTAAATTCGACGCTACAGTTGAAGTGGCTTCCGTTTAGGGGTT  
GACCTCGTAAAAACGACCAGCAAAATCCGTGGAGCAGTTGTGCTTCCAAACGGAACCTGGTAAAACTCAGCGCTTCTCGTTTTCGC  
AAAAGCGGAAAAAGCGAAAGAAGCTGAAGCTGCTGGTGCAGATTTTCGTAGGCGATACTGACTACATCAACAAAAATCAACAAGGCT  
GGTTTCGATTTTCGATTTATCGTAGCTACACCTGACATGAGTGGTGAAGTTGGTAAAAATCGGTCGTGTACTGGACCAAAAGGTTA  
ATGCCGAACCCATAAAGTGGTACAGGTACCGTCCGACCTACTGAAGTGGATTTCTTTAAGCTAGAGGATCGATCTGTATAATAA  
AGAATAATTATTAATCTGTAGACAAATTTGTGAAAGGATGTACTTAAACGCTAACGGTCAGCTTTATTTGAACAGTAATTTAAGTATA  
TGCCAATCTAGGTTAAGTAAATTTGAGTATCAATATAAACTTTATATGAACATAATCAACGAGGTGAAATCATGAGCAATTTGATT  
AACGAAAAATACCAATCAAGCGATTCAAACATTAATAATCGTAAAAAGATTTATTTGGAAGTTCATAGTTGGAGTATATCTATT  
TGTTTCAGCAGTAAATGGTGGTTTTACGCATTAACAGCGATGTAGATGTTCTAGTCTGTCGTAATCATAGTTTACCTCAATTAACCTC  
GAAAAAACTAACGAAAAGACTAATGACTATATCAGGAAAAGATTGAAAATACGGATTCTGTTAGACCACTTGAAGTTACGGTTATA  
AATAGGAGTGAAGTTGTCCCTTGGCAATATCCTCCAAAAAGAGAATTTATATACGGTGAGTGGCTCAGGGGTGAATTTGAGAATGG  
ACAAATTCAGGAACCAAGCTATGATCCTGATTTGGCTATTGTTTTAGCACAAAGCAAGAAAGAATAGTATTTCTCTATTTTGGTCCCTG  
ATTCTTCAAGTATACTTGTCTCCGTACCTTTGACAGATATTCGAAGACAAATTAAGGATTTCTTTGCCAGAATAATTTAGGGGATA  
AAAGGTGATGAGCGTAATGTAATTTTAACCTAGCTCGAATGTGGCAACAGTACTACTGGTGAATTTACCTCGAAAAGATGTCCG  
TGCAGAAATGGGCTATACCTCTTTTACCTAAAGAGCATGTAACCTTACTGGATATAGCTAGAAAAGGCTATCGGGGAGAGTGTGATG  
ATAAGTGGGAAGGACTATATTCAAAGGTGAAAGCACTCGTTAAGTATATGAAAAATTTCTATAGAACTTCTCTCAATTAGGCTAAT  
TTTTATTGCAATAACAGGTGCTTACTTTTCTGGAGTTCTTTAGCAAATTTTTTTTATTAGCTGAACCTTAGTATTAGTGGCCATACTCC  
TCCAATCCAAAGCTATTTAGAAAGATTAATATATCCTCAAACAGGCGGTAACCGGCTCTTTCATCGGGAATGCGCGGACCTTCCAG  
CATCGCCGGCATGTCCCCTGGCGGACGGGAAGTATCCAGCTCGAGGTGGGCGGCGGTTGCTGGCGTTTTTCCATAGGCTCCGCCC  
CCCTGACGAGCATCAGAAAATCGACGCTCAAGTCAGAGGTGGCGAAAACCCGACAGGACTATAAAGATACCAGGCGTTTCCCCTG  
GAAGTCCCCTCGTGCCTCTCCTGTTCCGACCCTGCCGCTTACCGGATACCTGTCCGCTTTCTCCCTTCGGGAAGCGTGGCGCTT  
TCTCATAGCTCACGCTGTAGGTATCTCAGTTCGGTGTAGGTGCTTCGCTCCAAGCTGGGCTGTGTGCACGAACCCCGCTTCCAGCC  
CGACCCTGCGCTTATCCGGTAACTATCGTCTTGAGTCCAACCCGTAAGACACGACTTATCGCCACTGGCAGCAGCCACTGGTA  
ACAGGATTAGCAGAGCGAGGTATGTAGCGGTGTACAGAGTTCTTGAAGTGGTGGCTAACTACGGCTACACTAGAAGGACAGTA  
TTTGGTATCTGCGCTCTGCTGAAGCCAGTTACCTTCGAAAAAGAGTTGATAGCTCTTGATCCGGCAAACAAACCACCGCTGGTAG  
CGGTGTTTTTTTTGTTTGAAGCAGCAGATTACGCGCAGAAAAAAGGATCTCAAGAAGATCCTTTGATCTTTTTTACGGGGTCTG  
ACGCTCAGTGAACGAAAACCTCACGTTAAGGGATTTTGGTCATGAGATTATCAAAAAGGATCTTACCTAGATCCTTTTAAATTA  
AATGAAGTTTTTAAATCAATCTAAAGTATATATGAGTAACTTGGTCTGACAGTTACCAATGC

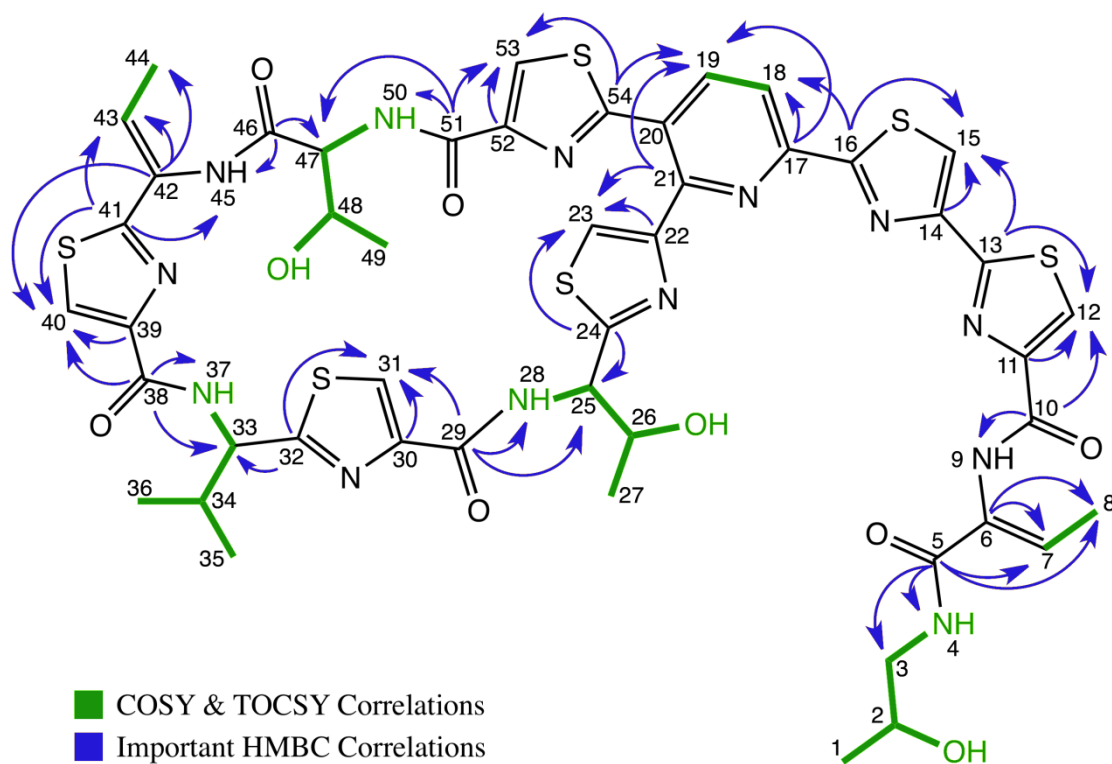

**FIG S2. Summary of NMR 2D correlations.** NMR analysis analysis identified a peptide-like backbone with a series of highly modified substituents, no N-terminus, and with a decarboxylated threonine at the C-terminus. The 2D NMR correlations implied a macrocyclic ring structure as well as several smaller aromatic rings, consistent with the structure of Micrococcin P1. Also, two of the threonine residues were dehydrated, leaving a double bond between the  $\alpha$  and  $\beta$  carbons; the six cysteine residues were each converted into a thiazole ring; and the two serine residues were condensed into a pyridine ring, making the macrocycle.

## SUPPLEMENTAL REFERENCES

1. **Vojcic L, Despotovic D, Martinez R, Maurer KH, Schwaneberg U.** 2012. An efficient transformation method for *Bacillus subtilis* DB104. *Appl Microbiol Biotechnol* **94**:487-493.
2. **Zhang XZ, Zhang Y.** 2011. Simple, fast and high-efficiency transformation system for directed evolution of cellulase in *Bacillus subtilis*. *Microb Biotechnol* **4**:98-105.
3. **Bowers AA, Walsh CT, Acker MG.** 2010. Genetic interception and structural characterization of thiopeptide cyclization precursors from *Bacillus cereus*. *J Am Chem Soc* **132**:12182-12184.
4. **Li C, Kelly WL.** 2010. Recent advances in thiopeptide antibiotic biosynthesis. *Nat Prod Rep* **27**:153-164.
5. **Wieland Brown LC, Acker MG, Clardy J, Walsh CT, Fischbach MA.** 2009. Thirteen posttranslational modifications convert a 14-residue peptide into the antibiotic thiocillin. *Proc Natl Acad Sci U S A* **106**:2549-2553.
